# Supplementary material for: Comparative Proteomics of Three Species of Ammonia-Oxidizing Bacteria
Source: PubMed Central journal article supplement (PMC5960693; doi:10.3389/fmicb.2018.00938), 2018-05-14
Supplement: Data_Sheet_1.pdf [file Data_Sheet_1.pdf]

## *Supplementary Material*

### **Comparative proteomics of three species of ammonia-oxidizing bacteria**

**Authors:**

Jackie K. Zorz<sup>1§</sup>, Jessica A. Kozlowski<sup>2</sup>, Lisa Y. Stein<sup>3</sup>, Marc Strous<sup>1</sup>, Manuel Kleiner<sup>4§</sup>

<sup>1</sup> Department of Geoscience, University of Calgary, Calgary, AB, Canada, <sup>2</sup> Department of Ecogenomics and Systems Biology, University of Vienna, Vienna, Austria, <sup>3</sup> Department of Biological Sciences, University of Alberta, Edmonton, AB, Canada, <sup>4</sup> Department of Plant and Microbial Biology, North Carolina State University, Raleigh, NC, United States

§corresponding authors

Email address:

jacqueline.zorz@ucalgary.ca

manuel\_kleiner@ncsu.edu

## Supplementary Tables

Supplementary Table 1. Culture growth and proteomics data

| Parameter                | <i>Nitrosomonas europaea</i>                                                   | <i>Nitrospira multiformis</i>                           | <i>Nitrosomonas ureae</i>                               |                                                         |
|--------------------------|--------------------------------------------------------------------------------|---------------------------------------------------------|---------------------------------------------------------|---------------------------------------------------------|
| <b>Culture Growth</b>    | Average generation time during exponential growth in pre-cultures              | 0.61 ± 0.02 days                                        | 1.0 ± 0.2 days                                          | 1.3 ± 0.4 days                                          |
|                          | Cell count in 6-11 day old pre-cultures before transfer                        | 1.32 x 10 <sup>7</sup> ± 3.2 x 10 <sup>6</sup> cells/mL | 2.2 x 10 <sup>7</sup> ± 3.0 x 10 <sup>6</sup> cells/mL  | 1.94 x 10 <sup>7</sup> ± 6.5 x 10 <sup>6</sup> cells/mL |
|                          | Cell count in starved cultures at the end of the 24 hour experiment            | 1.17 x 10 <sup>7</sup> ± 4.3 x 10 <sup>6</sup> cells/mL | 1.57 x 10 <sup>7</sup> ± 4.9 x 10 <sup>6</sup> cells/mL | 1.43 x 10 <sup>7</sup> ± 4.2 x 10 <sup>6</sup> cells/mL |
|                          | Ammonia concentration in in 6-11 day old pre-cultures before transfer          | 0.8 ± 1.3 mM                                            | 3.9 ± 1.6 mM                                            | 4.6 ± 1.6 mM                                            |
|                          | Ammonia concentration in starved cultures after 24 hours of starvation         | Not Detected                                            | Not Detected                                            | Not Detected                                            |
|                          | Ammonia concentration in control cultures at the end of the 24 hour experiment | 8.7 ± 0.6 mM                                            | 7.9 ± 0.4 mM                                            | 8.4 ± 0.3 mM                                            |
|                          | Nitrite concentration in 6-11 day old pre-cultures before transfer             | 9.9 ± 1.0 mM                                            | 6.5 ± 1.3 mM                                            | 5.4 ± 1.5 mM                                            |
|                          | Nitrite concentration in starved cultures after 24 hours of starvation         | Not Detected                                            | Not Detected                                            | Not Detected                                            |
|                          | Nitrite concentration in control cultures at the end of the 24 hour experiment | 0.28 ± 0.1 mM                                           | 0.97 ± 0.1 mM                                           | 0.25 ± 0.1 mM                                           |
| <b>Mass spectrometry</b> | MS/MS total                                                                    | 839518                                                  | 914235                                                  | 692064                                                  |
|                          | Average MS/MS per sample                                                       | 139920                                                  | 152373                                                  | 138413                                                  |
|                          | PSMs                                                                           | 317610                                                  | 396701                                                  | 261843                                                  |
|                          | Peptide Groups                                                                 | 16528                                                   | 20885                                                   | 17394                                                   |
|                          | Proteins (all confidence)                                                      | 2085                                                    | 2457                                                    | 2406                                                    |
|                          | Proteins (only high and medium confidence) (% of proteome expressed)           | 814 (32%)                                               | 1064 (37%)                                              | 891 (30%)                                               |
|                          | Protein Groups                                                                 | 2046                                                    | 2430                                                    | 2339                                                    |

Supplementary Table 2. Accession numbers of select proteins involved in ammonia oxidation and electron transfer included in Figure 1.

| <b>Enzyme</b>                   | <i>N. europaea</i>         | <i>N.<br/>multiformis</i> | <i>N. ureae</i>          |
|---------------------------------|----------------------------|---------------------------|--------------------------|
| Ammonia monooxygenase subunit A | Q04507                     | Q2YAW5                    | A0A0S3AG12               |
| Ammonia monooxygenase subunit B | Q04508                     | Q2Y6K6                    | A0A0S3AFP0               |
| Ammonia monooxygenase subunit C | H2VFO0<br>Q82T63<br>H2VFO7 | Q2YAW6                    | A0A0S3AFN9<br>A0A0S3AI82 |
| Hydroxylamine oxidoreductase    | Q50925                     | Q2YA36<br>Q2YA35          | A0A0S3AFC8               |
| Nitrite reductase               | Q82VX5                     | Q2Y7H8                    | A0A0S3AFD2               |
| Nitric oxide reductase          | Q82TA3                     | Q2Y9L3<br>Q2Y9L2          | n/a                      |
| Nitrosocyanin                   | Q820S6                     | Q2Y8L9                    | A0A0S3AFA2               |
| Cytochrome c-554                | Q57142                     | Q2YA34                    | A0A0S3AN35               |
| Cytochrome c-552                | P95339                     | Q2YC69                    | A0A0S3AF59               |
| Cytochrome P460 (cytL)          | H2VFO9                     | n/a                       | A0A0S3AFC9               |
| Cytochrome c' beta (cytS)       | Q82W71                     | Q2Y648                    | A0A0S3AI53               |
| Cytochrome cm-552               | Q50926                     | Q2YA33                    | A0A0S3AK12               |
| Cytochrome aa3                  | Q82VP9                     | Q2YCN0<br>Q2Y847          | A0A0S3AH24               |
| Cytochrome bc1                  | Q82VQ3                     | Q2Y849<br>Q2YCM6          | A0A0S3AGL8               |

Supplementary Table 3. Accession numbers of enzymes involved in the CBB cycle for all three strains. Number in the first column corresponds to the numbers used in Figure 2b for enzyme identification

|    | <b>Enzyme</b>                               | <i>N. europaea</i> | <i>N. multiformis</i> | <i>N. ureae</i>          |
|----|---------------------------------------------|--------------------|-----------------------|--------------------------|
| 1  | RubisCO large chain                         | Q82TG6             | Q2YB78                | A0A0S3AHX5<br>A0A0S3AFL1 |
| 1  | RubisCO small chain                         | Q82TG7             | Q2YB79                | A0A0S3AHZ4<br>A0A0S3AFG4 |
| 2  | Phosphoglycerate kinase                     | Q82XE8             | Q2YC27                | A0A0S3AI02               |
| 3  | Glyceraldehyde-3-phosphate dehydrogenase    | Q82XE7             | Q2YC26                | A0A0S3AHS1               |
| 4  | Triosephosphate isomerase                   | Q82TU1             | Q2YA29                | A0A0S3AID8               |
| 5  | Fructose-bisphosphate aldolase              | Q82XF0             | Q2Y8Q7<br>Q2YC29      | A0A0S3AHR8<br>A0A0S3AN59 |
| 6  | Sedoheptulose biphosphatase                 | n/a                | n/a                   | n/a                      |
| 7  | Fructose-1,6-bisphosphatase                 | Q82WY3             | n/a                   | n/a                      |
| 8  | Transketolase                               | Q820H7<br>Q82XE6   | Q2YBU5<br>Q2YC25      | A0A0S3AHS4               |
| 9  | Ribulose-phosphate-3-epimerase              | Q82SZ5             | Q2Y6G1                | A0A0S3AGL5               |
| 10 | Ribose-5-phosphate isomerase                | Q82TX6             | Q2YBX7                | A0A0S3AHL4               |
| 11 | Phosphoribulokinase                         | Q82UL0             | Q2YBK1                | A0A0S3AM16               |
| 12 | Pyrophosphate-dependent phosphofructokinase | Q82TF4             | Q2YB24                | A0A0S3AI36               |
| 13 | Inositol monophosphatase/type IV F1P6Pase   | Q82TE3             | Q2YB92                | A0A0S3AHX4<br>A0A0S3AIS2 |

Supplementary Table 4. Description of ortholog information found in Supplementary excel tables 7-9

| <b>Orthologous proteins found in the AOB genomes: <i>Nitrosomonas europaea</i> (Ne), <i>Nitrospira multiformis</i> (Nm), and <i>Nitrosomonas ureae</i> (Nu)</b> |                       |                                                                                          |
|-----------------------------------------------------------------------------------------------------------------------------------------------------------------|-----------------------|------------------------------------------------------------------------------------------|
| All orthologs were identified using the program Orthovenn:<br><a href="http://www.bioinfogenome.net/OrthoVenn/">http://www.bioinfogenome.net/OrthoVenn/</a>     |                       |                                                                                          |
| <b>Table</b>                                                                                                                                                    | <b>Name</b>           | <b>Description</b>                                                                       |
| <b>7</b>                                                                                                                                                        | Single_gene_orthologs | Orthologs found in all three genomes but in only one copy per genome                     |
| <b>8</b>                                                                                                                                                        | Singletons            | Expressed proteins from one genome that had no ortholog matches in the other two genomes |
| <b>9</b>                                                                                                                                                        | Two_species_orthologs | Orthologs found in 2 of three genomes in one copy per genome                             |

Supplementary Table 5. Top 50 most abundant proteins (% relative abundance) for each species investigated in this study. If genes are orthologous between species they are displayed in the same row.

| <i>N. europaea</i><br>Accession | <i>N. multiformis</i><br>Accession | <i>N. ureae</i><br>Accession | Description                                | <i>N. europaea</i> | <i>N. multiformis</i> | <i>N. ureae</i> |
|---------------------------------|------------------------------------|------------------------------|--------------------------------------------|--------------------|-----------------------|-----------------|
| Q82Y61                          | Q2Y6I5                             | A0A0S3AG00                   | 10 kDa chaperonin                          | 0.846225           | 1.574932              | 1.86374         |
| Q82X89                          | Q2YAZ8                             | A0A0S3AJF2                   | 30S ribosomal protein S10                  | 0.676294           | 0.323518              | 0.470631        |
| Q82XS9                          | Q2Y5X8                             | A0A0S3ALZ6                   | 30S ribosomal protein S15                  | 0.451646           | 0.290156              | 0.308619        |
| Q82TZ6                          | Q2YBA7                             | A0A0S3AH93                   | 30S ribosomal protein S2                   | 0.522609           | 0.385369              | 0.517171        |
| Q82XN1                          | Q2Y7B7                             | A0A0S3AI43                   | 30S ribosomal protein S21                  | 0.610866           | 0.283116              | 0.293264        |
| Q82X70                          | Q2YAX3                             | A0A0S3AJF4                   | 30S ribosomal protein S4 A                 | 0.437628           | 0.245854              | 0.351479        |
| Q82X77                          | Q2YAY3                             | A0A0S3AJR2                   | 30S ribosomal protein S8                   | 0.12818            | 0.437497              | 0.21617         |
| Q82T72                          | Q2YB08                             | A0A0S3AKH3                   | 50S ribosomal protein L1                   | 0.429505           | 0.364462              | 0.722339        |
| Q82U36                          | Q2YBJ1                             | A0A0S3AG28                   | 50S ribosomal protein L19                  | 0.891615           | 0.474541              | 0.635273        |
| Q820Q9                          | Q2YAY5                             | A0A0S3AJC4                   | 50S ribosomal protein L5                   | 0.457054           | 0.335299              | 0.400319        |
| Q82T74                          | Q2YB06                             | A0A0S3AKV6                   | 50S ribosomal protein L7/L12               | 0.814855           | 0.408266              | 0.599014        |
| Q82XQ9                          | Q2Y7M8                             | A0A0S3AGH1                   | 50S ribosomal protein L9                   | 0.446776           | 0.457042              | 0.342599        |
| Q82Y60                          | Q2Y6I6                             | A0A0S3AFK1                   | 60 kDa chaperonin                          | 1.691542           | 1.393075              | 1.874853        |
| Q82U57                          | Q2YA43                             | A0A0S3AGN4                   | Acyl carrier protein                       | 0.596629           | 0.60277               | 0.352774        |
| Q820H3                          |                                    |                              | Alkyl hydroperoxide reductase              | 0.913294           | 0                     | 0               |
| Q04507                          | Q2YAW5                             | A0A0S3AG12                   | Ammonia monooxygenase subunit A            | 1.278051           | 0.879039              | 0.614642        |
| Q04508                          | Q2Y6K6                             | A0A0S3AFP0                   | Ammonia monooxygenase subunit B            | 3.456044           | 3.806341              | 3.490765        |
| H2VFU7                          | Q2YAW6                             | A0A0S3AI82/<br>A0A0S3AFN9    | Ammonia monooxygenase subunit C            | 0.434124           | 0.223191              | 0.288361        |
| Q82XQ0                          | Q2YCA5                             | A0A0S3AHF6                   | ATP synthase subunit alpha                 | 1.107305           | 0.592557              | 0.88902         |
| Q82XQ2                          | Q2YCA7                             | A0A0S3AGP9                   | ATP synthase subunit b                     | 0.554859           | 0.19427               | 0.672047        |
| Q82XP8                          | Q2YCA3                             | A0A0S3AH35                   | ATP synthase subunit beta                  | 1.135587           | 0.700324              | 0.984254        |
| Q82SU7                          | Q2Y6J3                             | A0A0S3AK75                   | Bacterial histone-like DNA-binding protein | 1.768732           | 0.851644              | 1.095308        |
| Q82XN8                          | Q2Y5H1                             | A0A0S3AGT0                   | Bacterial outer membrane protein 1         | 1.791239           | 0.62275               | 1.467036        |
| Q82S16                          | Q2Y6Z1                             | A0A0S3AMB4                   | Bacterial outer membrane protein 2         | 1.598599           | 1.349047              | 0.439786        |
| Q82W35                          | Q2Y6D6                             | A0A0S3AG51                   | Bacterioferritin 1                         | 0.244802           | 0.514984              | 0.017083        |
|                                 |                                    | A0A0S3AHF1                   | Bacterioferritin 2                         | 0                  | 0                     | 0.517586        |
| O06430                          | Q2Y6U0                             | A0A0S3AMV5                   | Chaperone protein DnaK                     | 0.312235           | 0.53606               | 0.48511         |
| Q82TY4                          | Q2Y6T3                             | A0A0S3AGH0                   | Cold-shock DNA-binding domain              | 0.485136           | 0.413581              | 0.162724        |
| Q82T65                          | Q2Y5C3                             | A0A0S3AIQ1                   | Copper resistance protein CopC             | 0.210375           | 0.793218              | 0.094398        |
|                                 | Q2Y9S4                             |                              | CsbD-like protein                          | 0                  | 0.447554              | 0               |
| Q82WJ0                          | Q2YCN0                             | A0A0S3AH24                   | Cytochrome c oxidase subunit 2             | 0.502984           | 0.940563              | 1.033047        |
| Q820P5                          | Q2Y5I3                             | A0A0S3AHP2                   | Cytochrome c, class I (1)                  | 0.29482            | 0.857655              | 1.147102        |
| Q82Y64                          | Q2YAF6                             | A0A0S3AI05                   | Cytochrome c, class I (2)                  | 0.698381           | 0.483805              | 0.485143        |
| Q820P4                          | Q2Y5I2                             | A0A0S3AHN4                   | Cytochrome c, class I (3)                  | 0                  | 0.398543              | 0.035166        |
| P55929                          | Q2YBW5                             | A0A0S3AK60                   | Cytochrome c551 peroxidase                 | 0.593571           | 0.300997              | 0.676175        |
| P95339                          | Q2YC69                             | A0A0S3AF59                   | Cytochrome c-552                           | 1.656558           | 0.544832              | 0.975231        |

| <i>N. europaea</i><br>Accession | <i>N. multiformis</i><br>Accession | <i>N. ureae</i><br>Accession | Description                                     | <i>N. europaea</i> | <i>N. multiformis</i> | <i>N. ureae</i> |
|---------------------------------|------------------------------------|------------------------------|-------------------------------------------------|--------------------|-----------------------|-----------------|
| Q57142                          | Q2YA34                             | A0A0S3AN35                   | Cytochrome c-554                                | 0.38086            | 0.567094              | 0.324274        |
| Q81ZS3                          | Q2YAZ9                             | A0A0S3AJP6                   | Elongation factor Tu                            | 1.288032           | 0.956967              | 0.969499        |
| O85348                          | Q2Y9P0                             | A0A0S3AMG9                   | Enolase                                         | 0.206378           | 0.405045              | 0.17379         |
|                                 |                                    | A0A0S3AMA6                   | Entry exclusion lipoprotein<br>TrbK             | 0                  | 0                     | 0.88014         |
| Q82UA3                          | Q2Y9D1                             | A0A0S3AJU9                   | Flagellin                                       | 0                  | 0.425687              | 0.005116        |
| Q82XF0                          | Q2YC29                             | A0A0S3AHR8                   | Fructose-bisphosphate aldolase,<br>class-II     | 0.615506           | 0.573238              | 0.518293        |
| Q82S02                          | Q2Y5X1                             | A0A0S3AG80                   | General diffusion Gram-<br>negative porins      | 4.362663           | 1.130986              | 1.975695        |
| Q82XE7                          | Q2YC26                             | A0A0S3AHS1                   | Glyceraldehyde-3-phosphate<br>dehydrogenase     | 0.528227           | 0.466577              | 0.398451        |
| Q82T55                          | Q2Y862                             | A0A0S3AHM5                   | Heat-shock protein Hsp20                        | 0.110254           | 0.018025              | 0.912376        |
| Q50925                          | Q2YA36                             | A0A0S3AFC8                   | Hydroxylamine oxidoreductase                    | 0.813608           | 0.56955               | 0.734522        |
|                                 | Q2YBA8                             |                              | Membrane-anchored ribosome-<br>binding protein  | 0                  | 0.839309              | 0               |
| Q82S91                          |                                    |                              | Metal-binding protein SmbP                      | 0.826463           | 0                     | 0               |
|                                 |                                    | A0A0S3AFD2                   | Nitrite reductase                               | 0                  | 0                     | 2.88794         |
| Q820S6                          | Q2Y8L9                             | A0A0S3AFA2                   | Nitrosocyanin                                   | 1.690333           | 1.803488              | 2.270346        |
| Q82UR3                          | Q2Y764                             | A0A0S3AG66                   | Peptidylprolyl isomerase                        | 0.949204           | 0.904461              | 0.904942        |
|                                 |                                    | A0A0S3AN75                   | Peroxidase                                      | 0                  | 0                     | 0.519497        |
| Q82UL0                          | Q2YBK1                             | A0A0S3AM16                   | Phosphoribulokinase                             | 0.637692           | 0.218003              | 0.269243        |
|                                 | Q2YCH1                             |                              | Polysaccharide export outer<br>membrane protein | 0                  | 0.507212              | 0               |
|                                 | Q2YCK2                             | A0A0S3AKS4                   | Probable thiol peroxidase                       | 0                  | 0.633906              | 0.63237         |
| Q82V25                          | Q2YBW8                             | A0A0S3AN41                   | Protease FtsH subunit HflK                      | 0.494951           | 0.223529              | 0.458692        |
| Q82V26                          | Q2YBW9                             | A0A0S3AK31                   | Protein HflC                                    | 0.657266           | 0.226138              | 0.784248        |
| Q82XZ4                          | Q2Y859                             | A0A0S3ALY3                   | Putative exosortase-associated<br>protein       | 0.097042           | 0.416571              | 0.093435        |
| Q82XW6                          |                                    |                              | Putative lipoprotein                            | 0.637878           | 0                     | 0               |
| Q82T08                          |                                    |                              | Putative peptidoglycan binding<br>domain 1      | 0.523396           | 0                     | 0               |
| Q82TG6                          |                                    | A0A0S3AFL1                   | RuBisCO Large Form Ia <sub>q</sub>              | 1.10913            | 0                     | 0.518812        |
|                                 | Q2YB78                             | A0A0S3AHX5                   | RuBisCO Large Form IC                           | 0                  | 1.788213              | 0.81335         |
| Q82TG7                          |                                    | A0A0S3AFG4                   | RuBisCO Small Form Ia <sub>q</sub>              | 0.505822           | 0                     | 0.17916         |
|                                 | Q2YB79                             | A0A0S3AHZ4                   | RuBisCO Small Form IC                           | 0                  | 2.375144              | 0.942758        |
|                                 | Q2Y7X9                             | A0A0S3AFT3                   | Rubryerythrin                                   | 0                  | 1.226076              | 1.222623        |
| Q82W28                          | Q2YBR2                             | A0A0S3ALT7                   | Superoxide dismutase                            | 0.193307           | 0.450574              | 0.102243        |
| Q82VN2                          | Q2Y793                             | A0A0S3AKZ2                   | Thioredoxin                                     | 0.631354           | 0.744102              | 0.631109        |
|                                 |                                    | A0A0S3AKX1                   | Transcriptional regulator                       | 0                  | 0                     | 0.686909        |
| Q82U33                          | Q2Y5K7                             | A0A0S3AGF6                   | Uncharacterized protein 1                       | 0.227662           | 0.672991              | 0.442144        |
| Q82V11                          |                                    | A0A0S3AFG5                   | Uncharacterized protein 10                      | 0.604306           | 0                     | 0.654737        |
| Q82T66                          | Q2Y5C5                             |                              | Uncharacterized protein 11                      | 0.675596           | 0.409756              | 0               |
|                                 | Q2YCH2                             |                              | Uncharacterized protein 12                      | 0                  | 0.515004              | 0               |
|                                 |                                    | A0A0S3AIE3                   | Uncharacterized protein 13                      | 0                  | 0                     | 0.498152        |
|                                 |                                    | A0A0S3AI57                   | Uncharacterized protein 14                      | 0                  | 0                     | 0.778513        |
| Q82VW3                          | Q2Y5C2                             |                              | Uncharacterized protein 15                      | 0.977299           | 0.427238              | 0               |

| <i>N. europaea</i><br>Accession | <i>N. multiformis</i><br>Accession | <i>N. ureae</i><br>Accession | Description                | <i>N. europaea</i> | <i>N. multiformis</i> | <i>N. ureae</i> |
|---------------------------------|------------------------------------|------------------------------|----------------------------|--------------------|-----------------------|-----------------|
|                                 |                                    | A0A0S3AMF4                   | Uncharacterized protein 16 | 0                  | 0                     | 0.452306        |
| Q82TN1                          |                                    |                              | Uncharacterized protein 17 | 0.986341           | 0                     | 0               |
| Q82VB7                          | Q2Y6Q8                             | A0A0S3AGF9                   | Uncharacterized protein 2  | 0.395486           | 0.140708              | 0.470865        |
| Q82VY9                          |                                    |                              | Uncharacterized protein 3  | 0.754294           | 0                     | 0               |
|                                 | Q2Y9X6                             |                              | Uncharacterized protein 4  | 0                  | 0.807647              | 0               |
|                                 | Q2Y9X8                             |                              | Uncharacterized protein 5  | 0                  | 0.687904              | 0               |
|                                 |                                    | A0A0S3AFI8                   | Uncharacterized protein 6  | 0                  | 0                     | 0.78225         |
|                                 |                                    | A0A0S3AIB4                   | Uncharacterized protein 7  | 0                  | 0                     | 1.54947         |
|                                 |                                    | A0A0S3AKF1                   | Uncharacterized protein 8  | 0                  | 0                     | 0.713927        |
| Q82TI0                          |                                    |                              | Uncharacterized protein 9  | 2.156594           | 0                     | 0               |

\* Proteins without accession numbers do not contain an ortholog for that gene.



Supplementary Table 6. Spearman correlation values between generation time of cultures and protein expression. The final column specifies if the protein is expressed to a higher level in faster or slower growing cells. All relationships are significant  $p < 0.05$

| <i>N. europaea</i><br>Accession | <i>N. multiformis</i><br>Accession | <i>N. ureae</i><br>Accession | Protein                                         | Spearman<br>Correlation |        |
|---------------------------------|------------------------------------|------------------------------|-------------------------------------------------|-------------------------|--------|
| Q82XJ5                          | Q2Y5Q2                             | A0A0S3AGP1                   | Methionine aminopeptidase                       | -0.93                   | Faster |
| Q82UK0                          | Q2YBK2                             | A0A0S3AIX5                   | 50S ribosomal protein L13                       | -0.93                   | Faster |
| Q82U38                          | Q2YBJ4                             | A0A0S3AGI4                   | 30S ribosomal protein S16                       | -0.93                   | Faster |
| Q82X87                          | Q2YAZ6                             | A0A0S3AJE3                   | 50S ribosomal protein L4                        | -0.92                   | Faster |
| Q82XE6                          | Q2YC25                             | A0A0S3AHS4                   | Transketolase                                   | -0.9                    | Faster |
| Q82UH7                          | Q2YAV7                             | A0A0S3AH46                   | 2-alkenal reductase                             | -0.88                   | Faster |
| Q820R9                          | Q2Y6Y7                             | A0A0S3AJB3                   | Prephenate dehydratase                          | 0.88                    | Slower |
| Q82X83                          | Q2YAZ2                             | A0A0S3AJB6                   | 50S ribosomal protein L22                       | -0.88                   | Faster |
| Q82Y61                          | Q2Y6I5                             | A0A0S3AG00                   | 10 kDa chaperonin                               | 0.88                    | Slower |
| Q82VV2                          | Q2YBS5                             | A0A0S3AMP6                   | Translation initiation factor IF-3              | 0.87                    | Slower |
| Q82TV8                          | Q2YA09                             | A0A0S3AIF6                   | Chaperone protein HtpG                          | 0.87                    | Slower |
| Q82WB8                          | Q2Y7A2                             | A0A0S3AMD6                   | Dihydrolipoamide dehydrogenase                  | 0.87                    | Slower |
| Q82X86                          | Q2YAZ5                             | A0A0S3AJE4                   | 50S ribosomal protein L23                       | -0.87                   | Faster |
| Q82XQ6                          | Q2Y7M5                             | A0A0S3AGW2                   | 30S ribosomal protein S6                        | -0.87                   | Faster |
| Q82U47                          | Q2YBT3                             | A0A0S3AMI5                   | Transcription elongation factor GreA            | 0.87                    | Slower |
| Q82VT2                          | Q2Y629                             | A0A0S3AHI1                   | Transcriptional regulator MraZ                  | 0.85                    | Slower |
| Q82VZ3                          | Q2Y826                             | A0A0S3AFK9                   | ATP dependent zinc metalloprotease FtsH         | -0.85                   | Faster |
| Q82UR0                          | Q2YA84                             | A0A0S3AME4                   | Protease HtpX homolog                           | -0.85                   | Faster |
| Q82TL0                          | Q2YCS7                             | A0A0S3AGB8                   | Oxygen dependent coproporphyrinogen III oxidase | -0.85                   | Faster |
| Q82TR4                          | Q2YA39                             | A0A0S3AGX9                   | Succinate CoA ligase ADP forming subunit beta   | -0.85                   | Faster |
| Q82WI5                          | Q2Y7Q9                             | A0A0S3AFU9                   | Aspartate semialdehyde dehydrogenase            | 0.85                    | Slower |
| Q82VE9                          | Q2Y6A4                             | A0A0S3AJ65                   | Preprotein translocase subunit YajC             | 0.85                    | Slower |
| Q82S95                          | Q2Y798                             | A0A0S3AJD6                   | Delta aminolevulinic acid dehydratase           | -0.83                   | Faster |
| Q82VA9                          | Q2YBL2                             | A0A0S3AHB1                   | Glycine tRNA ligase alpha subunit               | -0.83                   | Faster |
| Q820P5                          | Q2Y5I3                             | A0A0S3AHP2                   | Cytochrome C                                    | 0.83                    | Slower |
| Q82SM8                          | Q2YBB8                             | A0A0S3AJ95                   | Cell division protein ZipA                      | -0.83                   | Faster |
| Q82VQ4                          | Q2YCM4                             | A0A0S3AH18                   | SURF1 like protein                              | 0.82                    | Slower |
| Q82W40                          | Q2Y9W8                             | A0A0S3AGT7                   | Pyridine nucleotide disulfide oxidoreductase    | 0.82                    | Slower |
| Q82TU6                          | Q2YA24                             | A0A0S3AIH8                   | NADH quinone oxidoreductase subunit D           | -0.82                   | Faster |
| Q82TU9                          | Q2YA21                             | A0A0S3AIH4                   | NADH quinone oxidoreductase                     | -0.82                   | Faster |
| Q82X88                          | Q2YAZ7                             | A0A0S3AJB1                   | 50S ribosomal protein L3                        | -0.82                   | Faster |
| Q82Y48                          | Q2Y6P2                             | A0A0S3AHI6                   | Rhodanese                                       | 0.8                     | Slower |

| <i>N. europaea</i><br>Accession | <i>N. multiformis</i><br>Accession | <i>N. ureae</i><br>Accession | Protein                                      | Spearman<br>Correlation |        |
|---------------------------------|------------------------------------|------------------------------|----------------------------------------------|-------------------------|--------|
| Q82W16                          | Q2YBP4                             | A0A0S3AIW7                   | 4-hydroxythreonine-4-phosphate dehydrogenase | -0.8                    | Faster |
| Q82XT2                          | Q2YB74                             | A0A0S3AHL0                   | Transporter 2                                | -0.8                    | Faster |
| Q82UL0                          | Q2YBK1                             | A0A0S3AM16                   | Phosphoribulokinase                          | -0.8                    | Faster |
| Q82XC9                          | Q2YA70                             | A0A0S3AKR6                   | Biopolymer transporter ExbB                  | -0.8                    | Faster |
| Q82TZ7                          | Q2YBA5                             | A0A0S3AHB8                   | Uridylate kinase                             | 0.8                     | Slower |
| Q82X82                          | Q2YAZ0                             | A0A0S3AJA4                   | 50S ribosomal protein L16                    | -0.8                    | Faster |
| Q81ZS3                          | Q2YAZ9                             | A0A0S3AJP6                   | Elongation factor Tu                         | -0.8                    | Faster |

Supplementary tables 7-9 are available as separate files and contain statistical information about orthologous proteins identified in this study. Supplementary table 4 contains information on the contents of these files.

## Supplementary Figures

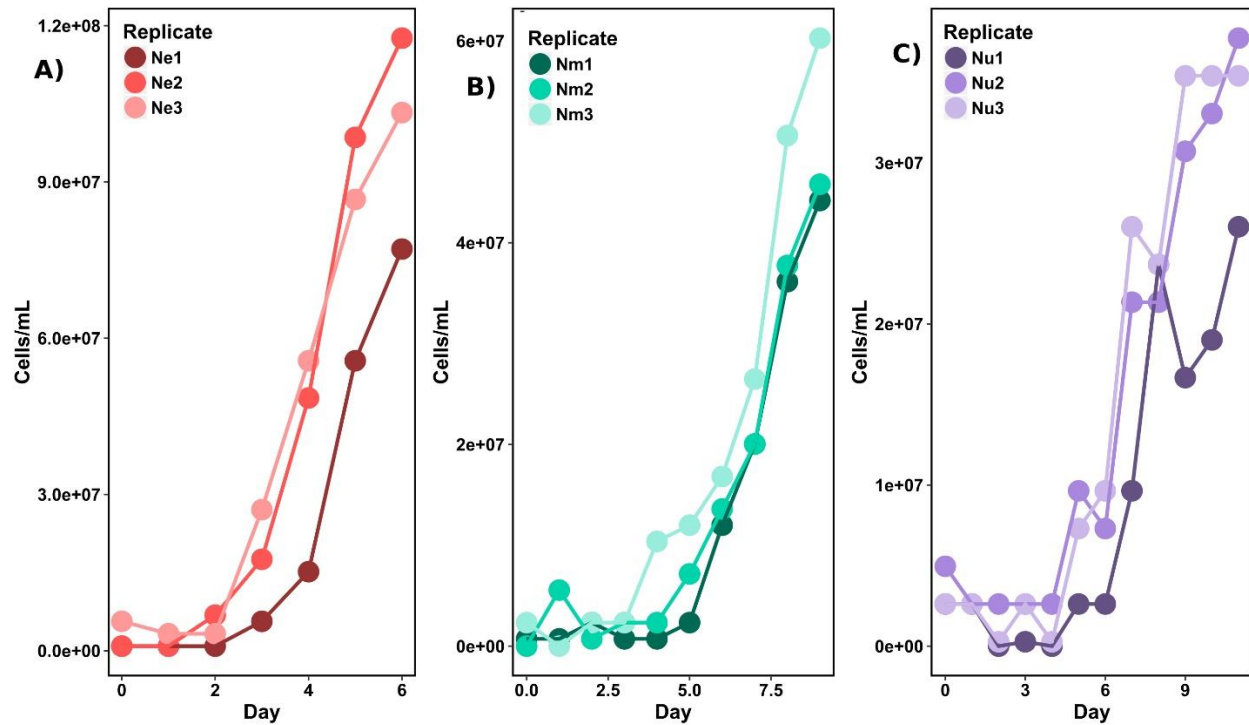

Supplementary Figure 1. Growth curves of the triplicate cultures, which were used for the starvation experiment. Cultures were spun down for the starvation experiment on the last day of cell density measurements. A) *N. europaea*, B) *N. multiformis*, C) *N. ureae*. Note that y-axis scales are not comparable. Average generation time during exponential growth for *N. europaea*:  $0.61 \pm 0.02$  days, *N. multiformis*:  $1.0 \pm 0.2$  days, *N. ureae*:  $1.3 \pm 0.4$  days.

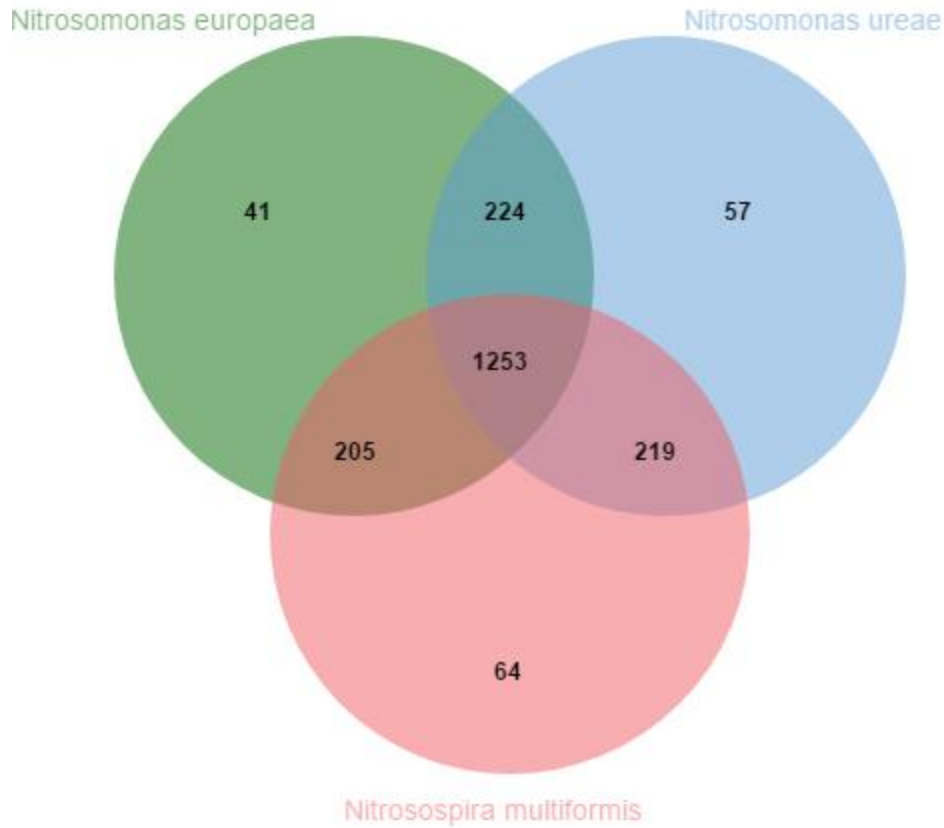

Supplementary Figure 2. Venn Diagram of paralogous and orthologous genes found in *N. europaea*, *N. ureae*, and *N. multiformis* produced by Orthovenn. Not included in this diagram are the singleton genes which have no orthologs or paralogs in these three species.

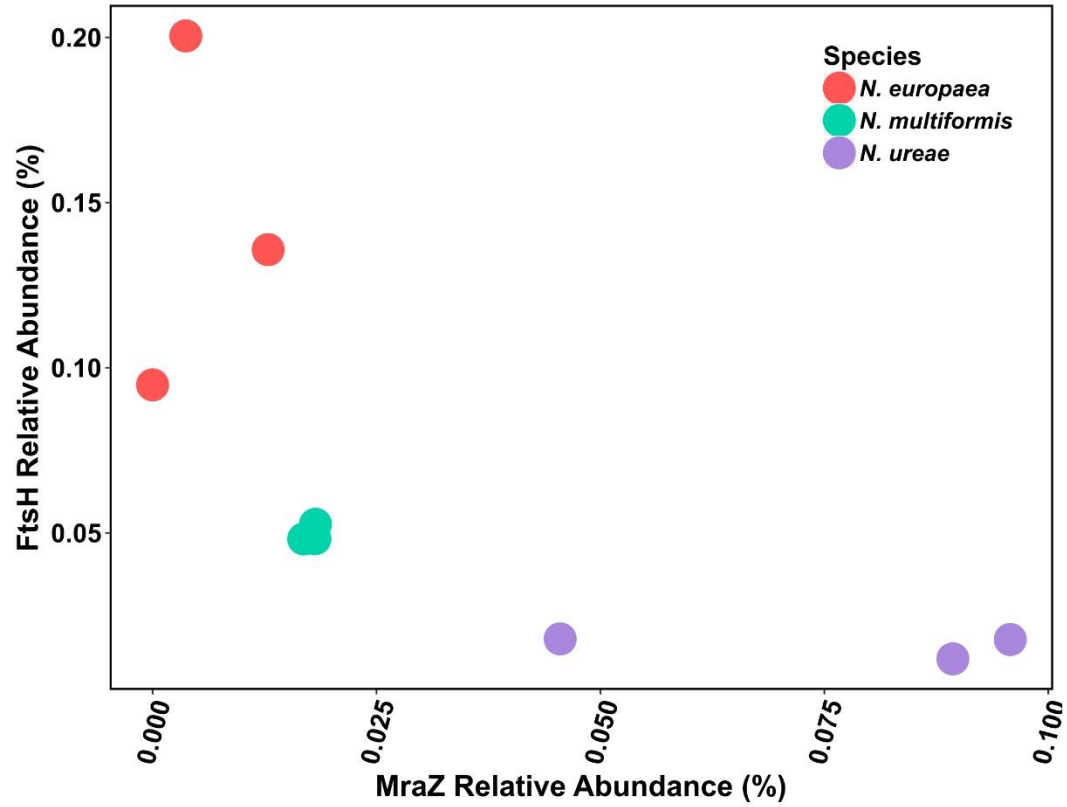

Supplementary Figure 3. Negative trend between MraZ relative abundance and FtsH relative abundance. Spearman correlation = -0.87,  $p < 0.005$ .
