# Supplementary material for: Comparative Proteomics of Three Species of Ammonia-Oxidizing Bacteria
Source: Front Microbiol. 2018 May 14;9:938. doi: 10.3389/fmicb.2018.00938 (PMC5960693; doi:10.3389/fmicb.2018.00938)
Supplement: Supplementary file 2 [file Table_8.XLSX]

## Sheet: Sheet1
Species	Accession	Description	Control_Average
Nitrosomonas_europaea	Q82X52	Uncharacterized protein OS=Nitrosomonas europaea (strain ATCC 19718 / CIP 103999 / KCTC 2705 / NBRC 14298) GN=NE0443 PE=4 SV=1	0.00234042
Nitrosomonas_europaea	Q82SN1	Chain length determinant protein OS=Nitrosomonas europaea (strain ATCC 19718 / CIP 103999 / KCTC 2705 / NBRC 14298) GN=epsB PE=4 SV=1	0.00327399
Nitrosomonas_europaea	Q82S41	ATP-dependent DNA helicase RecQ OS=Nitrosomonas europaea (strain ATCC 19718 / CIP 103999 / KCTC 2705 / NBRC 14298) GN=NE2520 PE=4 SV=1	0.00408682
Nitrosomonas_europaea	Q82UB5	mRNA interferase OS=Nitrosomonas europaea (strain ATCC 19718 / CIP 103999 / KCTC 2705 / NBRC 14298) GN=NE1579 PE=3 SV=1	0.00471843
Nitrosomonas_europaea	Q82WX1	BNR repeat OS=Nitrosomonas europaea (strain ATCC 19718 / CIP 103999 / KCTC 2705 / NBRC 14298) GN=NE0536 PE=4 SV=1	0.00516735
Nitrosomonas_europaea	Q82WK4	Possible membrane fusion protein MtrC OS=Nitrosomonas europaea (strain ATCC 19718 / CIP 103999 / KCTC 2705 / NBRC 14298) GN=NE0670 PE=4 SV=1	0.00519283
Nitrosomonas_europaea	Q82X15	Uncharacterized protein OS=Nitrosomonas europaea (strain ATCC 19718 / CIP 103999 / KCTC 2705 / NBRC 14298) GN=NE0485 PE=4 SV=1	0.00574714
Nitrosomonas_europaea	Q82X29	Uncharacterized protein OS=Nitrosomonas europaea (strain ATCC 19718 / CIP 103999 / KCTC 2705 / NBRC 14298) GN=NE0471 PE=1 SV=1	0.006347
Nitrosomonas_europaea	Q82WP7	TonB-dependent receptor protein OS=Nitrosomonas europaea (strain ATCC 19718 / CIP 103999 / KCTC 2705 / NBRC 14298) GN=oprC PE=4 SV=1	0.00720505
Nitrosomonas_europaea	Q82XF9	Possible multicopper oxidase OS=Nitrosomonas europaea (strain ATCC 19718 / CIP 103999 / KCTC 2705 / NBRC 14298) GN=mnxG PE=4 SV=1	0.00842815
Nitrosomonas_europaea	Q82SE5	Na(+)-translocating NADH-quinone reductase subunit C OS=Nitrosomonas europaea (strain ATCC 19718 / CIP 103999 / KCTC 2705 / NBRC 14298) GN=nqrC PE=3 SV=1	0.00872538
Nitrosomonas_europaea	Q82UX4	UDP-glucose/GDP-mannose dehydrogenase family OS=Nitrosomonas europaea (strain ATCC 19718 / CIP 103999 / KCTC 2705 / NBRC 14298) GN=udg PE=3 SV=1	0.00945115
Nitrosomonas_europaea	Q82TG2	Carbonic anhydrase OS=Nitrosomonas europaea (strain ATCC 19718 / CIP 103999 / KCTC 2705 / NBRC 14298) GN=NE1926 PE=3 SV=1	0.00954157
Nitrosomonas_europaea	Q82T13	TonB-dependent receptor protein OS=Nitrosomonas europaea (strain ATCC 19718 / CIP 103999 / KCTC 2705 / NBRC 14298) GN=NE2124 PE=3 SV=1	0.0105496
Nitrosomonas_europaea	Q82V91	Bacterial transferase hexapeptide repeat OS=Nitrosomonas europaea (strain ATCC 19718 / CIP 103999 / KCTC 2705 / NBRC 14298) GN=NE1207 PE=4 SV=1	0.0109444
Nitrosomonas_europaea	Q82XG0	Uncharacterized protein OS=Nitrosomonas europaea (strain ATCC 19718 / CIP 103999 / KCTC 2705 / NBRC 14298) GN=NE0314 PE=4 SV=1	0.0117316
Nitrosomonas_europaea	Q82SS1	Uncharacterized protein OS=Nitrosomonas europaea (strain ATCC 19718 / CIP 103999 / KCTC 2705 / NBRC 14298) GN=NE2236 PE=4 SV=1	0.012075
Nitrosomonas_europaea	Q82SR6	Uncharacterized protein OS=Nitrosomonas europaea (strain ATCC 19718 / CIP 103999 / KCTC 2705 / NBRC 14298) GN=NE2241 PE=4 SV=1	0.0127406
Nitrosomonas_europaea	Q82SN2	Polysaccharide export protein OS=Nitrosomonas europaea (strain ATCC 19718 / CIP 103999 / KCTC 2705 / NBRC 14298) GN=yccZ PE=4 SV=1	0.01298
Nitrosomonas_europaea	Q82SS3	Possible polyketide synthase OS=Nitrosomonas europaea (strain ATCC 19718 / CIP 103999 / KCTC 2705 / NBRC 14298) GN=hetM PE=4 SV=1	0.0134356
Nitrosomonas_europaea	Q82WT7	Major membrane protein I OS=Nitrosomonas europaea (strain ATCC 19718 / CIP 103999 / KCTC 2705 / NBRC 14298) GN=NE0574 PE=4 SV=1	0.0145031
Nitrosomonas_europaea	Q82TH9	Possible glutathione S-transferase family protein OS=Nitrosomonas europaea (strain ATCC 19718 / CIP 103999 / KCTC 2705 / NBRC 14298) GN=NE1908 PE=4 SV=1	0.0145162
Nitrosomonas_europaea	Q82UD9	Uncharacterized protein OS=Nitrosomonas europaea (strain ATCC 19718 / CIP 103999 / KCTC 2705 / NBRC 14298) GN=NE1551 PE=4 SV=1	0.0145196
Nitrosomonas_europaea	Q82T25	Uncharacterized protein OS=Nitrosomonas europaea (strain ATCC 19718 / CIP 103999 / KCTC 2705 / NBRC 14298) GN=NE2106 PE=4 SV=1	0.015053
Nitrosomonas_europaea	Q82XH9	Cytochrome c, class I OS=Nitrosomonas europaea (strain ATCC 19718 / CIP 103999 / KCTC 2705 / NBRC 14298) GN=NE0294 PE=4 SV=1	0.0161936
Nitrosomonas_europaea	Q82VD7	Uncharacterized protein OS=Nitrosomonas europaea (strain ATCC 19718 / CIP 103999 / KCTC 2705 / NBRC 14298) GN=NE1157 PE=4 SV=1	0.0163762
Nitrosomonas_europaea	Q82V59	Uncharacterized protein OS=Nitrosomonas europaea (strain ATCC 19718 / CIP 103999 / KCTC 2705 / NBRC 14298) GN=NE1242 PE=1 SV=1	0.0170342
Nitrosomonas_europaea	Q82S57	L-sorbosone dehydrogenase OS=Nitrosomonas europaea (strain ATCC 19718 / CIP 103999 / KCTC 2705 / NBRC 14298) GN=NE2501 PE=4 SV=1	0.0189963
Nitrosomonas_europaea	Q82W44	Sulfite reductase [NADPH] flavoprotein alpha-component OS=Nitrosomonas europaea (strain ATCC 19718 / CIP 103999 / KCTC 2705 / NBRC 14298) GN=yvgR PE=4 SV=1	0.0196979
Nitrosomonas_europaea	Q82XU0	ABC transporter, fused permease and ATPase domains OS=Nitrosomonas europaea (strain ATCC 19718 / CIP 103999 / KCTC 2705 / NBRC 14298) GN=NE0159 PE=4 SV=1	0.0213304
Nitrosomonas_europaea	Q82SL4	Uncharacterized NAD(FAD)-dependent dehydrogenases OS=Nitrosomonas europaea (strain ATCC 19718 / CIP 103999 / KCTC 2705 / NBRC 14298) GN=NE2303 PE=4 SV=1	0.0219905
Nitrosomonas_europaea	Q82SN4	NAD dependent epimerase/dehydratase family OS=Nitrosomonas europaea (strain ATCC 19718 / CIP 103999 / KCTC 2705 / NBRC 14298) GN=NE2277 PE=4 SV=1	0.0237188
Nitrosomonas_europaea	Q82TD3	Uncharacterized protein OS=Nitrosomonas europaea (strain ATCC 19718 / CIP 103999 / KCTC 2705 / NBRC 14298) GN=NE1965 PE=4 SV=1	0.0251007
Nitrosomonas_europaea	Q82WJ2	SCO1/SenC OS=Nitrosomonas europaea (strain ATCC 19718 / CIP 103999 / KCTC 2705 / NBRC 14298) GN=NE0682 PE=4 SV=1	0.0251394
Nitrosomonas_europaea	Q82T91	Glycosyl transferases group 1 OS=Nitrosomonas europaea (strain ATCC 19718 / CIP 103999 / KCTC 2705 / NBRC 14298) GN=NE2021 PE=4 SV=1	0.0256201
Nitrosomonas_europaea	Q82V30	Uncharacterized protein OS=Nitrosomonas europaea (strain ATCC 19718 / CIP 103999 / KCTC 2705 / NBRC 14298) GN=NE1280 PE=4 SV=1	0.0287328
Nitrosomonas_europaea	Q82SS0	FAD linked oxidase, N-terminal OS=Nitrosomonas europaea (strain ATCC 19718 / CIP 103999 / KCTC 2705 / NBRC 14298) GN=NE2237 PE=4 SV=1	0.0307693
Nitrosomonas_europaea	Q82V35	Uncharacterized protein OS=Nitrosomonas europaea (strain ATCC 19718 / CIP 103999 / KCTC 2705 / NBRC 14298) GN=NE1275 PE=4 SV=1	0.0318793
Nitrosomonas_europaea	Q82XT9	Outer membrane efflux protein OS=Nitrosomonas europaea (strain ATCC 19718 / CIP 103999 / KCTC 2705 / NBRC 14298) GN=NE0160 PE=4 SV=1	0.0324907
Nitrosomonas_europaea	Q82W45	Sulfite reductase [NADPH] hemoprotein beta-component OS=Nitrosomonas europaea (strain ATCC 19718 / CIP 103999 / KCTC 2705 / NBRC 14298) GN=cysI PE=3 SV=1	0.0325729
Nitrosomonas_europaea	Q82X25	Helix-turn-helix protein, CopG family OS=Nitrosomonas europaea (strain ATCC 19718 / CIP 103999 / KCTC 2705 / NBRC 14298) GN=NE0475 PE=4 SV=1	0.035034
Nitrosomonas_europaea	Q82XU1	Putative hemolysin-type secretion transmembrane protein OS=Nitrosomonas europaea (strain ATCC 19718 / CIP 103999 / KCTC 2705 / NBRC 14298) GN=NE0158 PE=4 SV=1	0.0377192
Nitrosomonas_europaea	Q82XT1	Uncharacterized protein OS=Nitrosomonas europaea (strain ATCC 19718 / CIP 103999 / KCTC 2705 / NBRC 14298) GN=NE0171 PE=4 SV=1	0.0433015
Nitrosomonas_europaea	Q82VX4	Cytochrome c, class I OS=Nitrosomonas europaea (strain ATCC 19718 / CIP 103999 / KCTC 2705 / NBRC 14298) GN=NE0926 PE=4 SV=1	0.0484981
Nitrosomonas_europaea	Q82V08	Uncharacterized protein OS=Nitrosomonas europaea (strain ATCC 19718 / CIP 103999 / KCTC 2705 / NBRC 14298) GN=NE1303 PE=4 SV=1	0.0511458
Nitrosomonas_europaea	Q82TK8	Uncharacterized protein OS=Nitrosomonas europaea (strain ATCC 19718 / CIP 103999 / KCTC 2705 / NBRC 14298) GN=NE1878 PE=4 SV=1	0.0581582
Nitrosomonas_europaea	Q82XY3	Uncharacterized protein OS=Nitrosomonas europaea (strain ATCC 19718 / CIP 103999 / KCTC 2705 / NBRC 14298) GN=NE0109 PE=4 SV=1	0.061941
Nitrosomonas_europaea	Q82WF0	TonB-dependent receptor protein OS=Nitrosomonas europaea (strain ATCC 19718 / CIP 103999 / KCTC 2705 / NBRC 14298) GN=NE0731 PE=3 SV=1	0.0693503
Nitrosomonas_europaea	Q82S49	NADH:flavin oxidoreductase/NADH oxidase OS=Nitrosomonas europaea (strain ATCC 19718 / CIP 103999 / KCTC 2705 / NBRC 14298) GN=NE2510 PE=4 SV=1	0.0743975
Nitrosomonas_europaea	Q82WY3	Fructose-1,6-bisphosphatase class 1 OS=Nitrosomonas europaea (strain ATCC 19718 / CIP 103999 / KCTC 2705 / NBRC 14298) GN=fbp PE=3 SV=1	0.0808979
Nitrosomonas_europaea	Q82TA6	Uncharacterized protein OS=Nitrosomonas europaea (strain ATCC 19718 / CIP 103999 / KCTC 2705 / NBRC 14298) GN=NE2001 PE=4 SV=1	0.0947692
Nitrosomonas_europaea	Q82X74	50S ribosomal protein L30 OS=Nitrosomonas europaea (strain ATCC 19718 / CIP 103999 / KCTC 2705 / NBRC 14298) GN=rpmD PE=3 SV=1	0.0975148
Nitrosomonas_europaea	Q82V14	Uncharacterized protein OS=Nitrosomonas europaea (strain ATCC 19718 / CIP 103999 / KCTC 2705 / NBRC 14298) GN=NE1297 PE=4 SV=1	0.0987816
Nitrosomonas_europaea	Q82UX8	H-NS histone family OS=Nitrosomonas europaea (strain ATCC 19718 / CIP 103999 / KCTC 2705 / NBRC 14298) GN=NE1339 PE=4 SV=1	0.129286
Nitrosomonas_europaea	Q82WY0	CBS domain OS=Nitrosomonas europaea (strain ATCC 19718 / CIP 103999 / KCTC 2705 / NBRC 14298) GN=NE0524 PE=4 SV=1	0.140605
Nitrosomonas_europaea	Q82TK7	Uncharacterized protein OS=Nitrosomonas europaea (strain ATCC 19718 / CIP 103999 / KCTC 2705 / NBRC 14298) GN=NE1879 PE=4 SV=1	0.165449
Nitrosomonas_europaea	Q82TW7	Uncharacterized protein OS=Nitrosomonas europaea (strain ATCC 19718 / CIP 103999 / KCTC 2705 / NBRC 14298) GN=NE1752 PE=4 SV=1	0.233194
Nitrosomonas_europaea	Q82V74	Carbonic anhydrase OS=Nitrosomonas europaea (strain ATCC 19718 / CIP 103999 / KCTC 2705 / NBRC 14298) GN=NE1227 PE=3 SV=1	0.255602
Nitrosomonas_europaea	Q82T00	30S ribosomal protein S4 B OS=Nitrosomonas europaea (strain ATCC 19718 / CIP 103999 / KCTC 2705 / NBRC 14298) GN=rpsD2 PE=3 SV=1	0.256248
Nitrosomonas_europaea	Q82WX9	CBS domain OS=Nitrosomonas europaea (strain ATCC 19718 / CIP 103999 / KCTC 2705 / NBRC 14298) GN=NE0525 PE=4 SV=1	0.303028
Nitrosomonas_europaea	Q82VX5	Multicopper oxidase type 1 OS=Nitrosomonas europaea (strain ATCC 19718 / CIP 103999 / KCTC 2705 / NBRC 14298) GN=aniA PE=1 SV=1	0.337597
Nitrosomonas_europaea	Q82V70	Uncharacterized protein OS=Nitrosomonas europaea (strain ATCC 19718 / CIP 103999 / KCTC 2705 / NBRC 14298) GN=NE1231 PE=4 SV=1	0.383037
Nitrosomonas_europaea	Q82T08	Putative peptidoglycan binding domain 1 OS=Nitrosomonas europaea (strain ATCC 19718 / CIP 103999 / KCTC 2705 / NBRC 14298) GN=NE2133 PE=4 SV=1	0.523396
Nitrosomonas_europaea	Q82VY9	Uncharacterized protein OS=Nitrosomonas europaea (strain ATCC 19718 / CIP 103999 / KCTC 2705 / NBRC 14298) GN=NE0910 PE=4 SV=1	0.754294
Nitrosomonas_ureae	A0A0S3AJI3	Uncharacterized protein OS=Nitrosomonas ureae GN=ATY38_08935 PE=4 SV=1	0.00142712
Nitrosomonas_ureae	A0A0S3AMD4	Uncharacterized protein OS=Nitrosomonas ureae GN=ATY38_14695 PE=4 SV=1	0.00213496
Nitrosomonas_ureae	A0A0S3AI03	Protocatechuate 3,4-dioxygenase OS=Nitrosomonas ureae GN=ATY38_05610 PE=4 SV=1	0.00243987
Nitrosomonas_ureae	A0A0S3AKW8	Uncharacterized protein OS=Nitrosomonas ureae GN=ATY38_10795 PE=4 SV=1	0.0032522
Nitrosomonas_ureae	A0A0S3ALG9	MEMO1 family protein ATY38_12685 OS=Nitrosomonas ureae GN=ATY38_12685 PE=3 SV=1	0.00394149
Nitrosomonas_ureae	A0A0S3ALG8	GTP-binding protein OS=Nitrosomonas ureae GN=ATY38_12800 PE=4 SV=1	0.00463654
Nitrosomonas_ureae	A0A0S3ALS9	Uncharacterized protein OS=Nitrosomonas ureae GN=ATY38_12555 PE=4 SV=1	0.00466708
Nitrosomonas_ureae	A0A0S3AIZ0	Uncharacterized protein OS=Nitrosomonas ureae GN=ATY38_07125 PE=4 SV=1	0.00524204
Nitrosomonas_ureae	A0A0S3AMH3	Uncharacterized protein OS=Nitrosomonas ureae GN=ATY38_13300 PE=4 SV=1	0.00534315
Nitrosomonas_ureae	A0A0S3ALS4	Lipase OS=Nitrosomonas ureae GN=ATY38_12680 PE=4 SV=1	0.00583584
Nitrosomonas_ureae	A0A0S3AF25	Uncharacterized protein OS=Nitrosomonas ureae GN=ATY38_00215 PE=4 SV=1	0.00602856
Nitrosomonas_ureae	A0A0S3AHQ0	Uncharacterized protein OS=Nitrosomonas ureae GN=ATY38_05290 PE=4 SV=1	0.00631493
Nitrosomonas_ureae	A0A0S3AKV1	Uncharacterized protein OS=Nitrosomonas ureae GN=ATY38_10710 PE=4 SV=1	0.00639278
Nitrosomonas_ureae	A0A0S3AGF7	Secretion protein HlyD OS=Nitrosomonas ureae GN=ATY38_02890 PE=4 SV=1	0.00684372
Nitrosomonas_ureae	A0A0S3AFN8	Uncharacterized protein OS=Nitrosomonas ureae GN=ATY38_00320 PE=4 SV=1	0.00772081
Nitrosomonas_ureae	A0A0S3ANE5	Diacylglycerol kinase OS=Nitrosomonas ureae GN=ATY38_06325 PE=4 SV=1	0.00823784
Nitrosomonas_ureae	A0A0S3AJU4	Carbonic anhydrase OS=Nitrosomonas ureae GN=ATY38_08785 PE=3 SV=1	0.00851525
Nitrosomonas_ureae	A0A0S3AN73	Disulfide bond formation protein DsbA OS=Nitrosomonas ureae GN=ATY38_08130 PE=4 SV=1	0.00862841
Nitrosomonas_ureae	A0A0S3AF04	Uncharacterized protein OS=Nitrosomonas ureae GN=ATY38_00105 PE=4 SV=1	0.00882083
Nitrosomonas_ureae	A0A0S3AJM8	Uncharacterized protein OS=Nitrosomonas ureae GN=ATY38_09145 PE=4 SV=1	0.00890331
Nitrosomonas_ureae	A0A0S3AH54	Uncharacterized protein OS=Nitrosomonas ureae GN=ATY38_04200 PE=4 SV=1	0.00900559
Nitrosomonas_ureae	A0A0S3AKS3	Uncharacterized protein OS=Nitrosomonas ureae GN=ATY38_11350 PE=4 SV=1	0.00921156
Nitrosomonas_ureae	A0A0S3AF55	Phosphoribosylglycinamide formyltransferase 2 OS=Nitrosomonas ureae GN=purT PE=3 SV=1	0.0100003
Nitrosomonas_ureae	A0A0S3AL30	Chemotaxis protein CheV OS=Nitrosomonas ureae GN=ATY38_10500 PE=4 SV=1	0.0106192
Nitrosomonas_ureae	A0A0S3AG49	Sulfotransferase OS=Nitrosomonas ureae GN=ATY38_02275 PE=4 SV=1	0.0108387
Nitrosomonas_ureae	A0A0S3AM65	Uncharacterized protein OS=Nitrosomonas ureae GN=ATY38_13290 PE=4 SV=1	0.0109333
Nitrosomonas_ureae	A0A0S3AMI1	Uncharacterized protein OS=Nitrosomonas ureae GN=ATY38_14825 PE=4 SV=1	0.0109771
Nitrosomonas_ureae	A0A0S3AN58	Uncharacterized protein OS=Nitrosomonas ureae GN=ATY38_10850 PE=4 SV=1	0.0114907
Nitrosomonas_ureae	A0A0S3AHY4	Uncharacterized protein OS=Nitrosomonas ureae GN=ATY38_05820 PE=4 SV=1	0.011751
Nitrosomonas_ureae	A0A0S3AJM2	Protein sphX OS=Nitrosomonas ureae GN=ATY38_09255 PE=4 SV=1	0.012198
Nitrosomonas_ureae	A0A0S3AFB5	Uncharacterized protein OS=Nitrosomonas ureae GN=ATY38_00500 PE=4 SV=1	0.0128772
Nitrosomonas_ureae	A0A0S3AKW7	Uncharacterized protein OS=Nitrosomonas ureae GN=ATY38_11630 PE=4 SV=1	0.0132054
Nitrosomonas_ureae	A0A0S3AML6	2-alkenal reductase OS=Nitrosomonas ureae GN=ATY38_14330 PE=4 SV=1	0.0137529
Nitrosomonas_ureae	A0A0S3ALP6	Type I-C CRISPR-associated protein Cas7/Csd2 OS=Nitrosomonas ureae GN=ATY38_13440 PE=4 SV=1	0.0138316
Nitrosomonas_ureae	A0A0S3AKD7	Uncharacterized protein OS=Nitrosomonas ureae GN=ATY38_10550 PE=4 SV=1	0.0139829
Nitrosomonas_ureae	A0A0S3AJU3	Antitoxin OS=Nitrosomonas ureae GN=ATY38_09435 PE=4 SV=1	0.0142542
Nitrosomonas_ureae	A0A0S3ALM6	Uncharacterized protein OS=Nitrosomonas ureae GN=ATY38_13100 PE=4 SV=1	0.0155074
Nitrosomonas_ureae	A0A0S3AM72	Uncharacterized protein OS=Nitrosomonas ureae GN=ATY38_13980 PE=4 SV=1	0.0157788
Nitrosomonas_ureae	A0A0S3AJM5	Uncharacterized protein OS=Nitrosomonas ureae GN=ATY38_09365 PE=4 SV=1	0.0158626
Nitrosomonas_ureae	A0A0S3AL09	Uncharacterized protein OS=Nitrosomonas ureae GN=ATY38_11760 PE=4 SV=1	0.0161092
Nitrosomonas_ureae	A0A0S3AH59	Uncharacterized protein OS=Nitrosomonas ureae GN=ATY38_04215 PE=4 SV=1	0.0161724
Nitrosomonas_ureae	A0A0S3AN31	Pyruvate carboxylase subunit A OS=Nitrosomonas ureae GN=ATY38_08395 PE=4 SV=1	0.0165729
Nitrosomonas_ureae	A0A0S3AHE9	Uncharacterized protein OS=Nitrosomonas ureae GN=ATY38_04025 PE=4 SV=1	0.0170522
Nitrosomonas_ureae	A0A0S3ANC3	Uncharacterized protein OS=Nitrosomonas ureae GN=ATY38_14165 PE=4 SV=1	0.0175273
Nitrosomonas_ureae	A0A0S3AJA6	Uncharacterized protein OS=Nitrosomonas ureae GN=ATY38_07700 PE=3 SV=1	0.017789
Nitrosomonas_ureae	A0A0S3AG52	Uncharacterized protein OS=Nitrosomonas ureae GN=ATY38_02325 PE=4 SV=1	0.018586
Nitrosomonas_ureae	A0A0S3AL48	Thiol-disulfide isomerase OS=Nitrosomonas ureae GN=ATY38_11795 PE=4 SV=1	0.0193903
Nitrosomonas_ureae	A0A0S3ALE8	Uncharacterized protein OS=Nitrosomonas ureae GN=ATY38_11095 PE=4 SV=1	0.0194357
Nitrosomonas_ureae	A0A0S3AI40	Copper oxidase OS=Nitrosomonas ureae GN=ATY38_06180 PE=4 SV=1	0.0194414
Nitrosomonas_ureae	A0A0S3AJA3	Pyruvate carboxylase subunit B OS=Nitrosomonas ureae GN=ATY38_08390 PE=4 SV=1	0.0197515
Nitrosomonas_ureae	A0A0S3AFW6	Ornithine decarboxylase OS=Nitrosomonas ureae GN=ATY38_01835 PE=3 SV=1	0.0197611
Nitrosomonas_ureae	A0A0S3AKI4	Uncharacterized protein OS=Nitrosomonas ureae GN=ATY38_10615 PE=4 SV=1	0.020189
Nitrosomonas_ureae	A0A0S3AKU8	Phage tail protein OS=Nitrosomonas ureae GN=ATY38_11695 PE=4 SV=1	0.0218593
Nitrosomonas_ureae	A0A0S3ALZ3	D-alanine--D-alanine ligase OS=Nitrosomonas ureae GN=ATY38_13985 PE=3 SV=1	0.0227335
Nitrosomonas_ureae	A0A0S3AGH6	Uncharacterized protein OS=Nitrosomonas ureae GN=ATY38_02485 PE=4 SV=1	0.0228733
Nitrosomonas_ureae	A0A0S3ALS8	Uncharacterized protein OS=Nitrosomonas ureae GN=ATY38_13295 PE=3 SV=1	0.0231018
Nitrosomonas_ureae	A0A0S3AN59	Fructose-bisphosphate aldolase OS=Nitrosomonas ureae GN=ATY38_11460 PE=4 SV=1	0.0235478
Nitrosomonas_ureae	A0A0S3AF70	Carboxymethylenebutenolidase OS=Nitrosomonas ureae GN=ATY38_00350 PE=4 SV=1	0.0252867
Nitrosomonas_ureae	A0A0S3AKC1	Uncharacterized protein OS=Nitrosomonas ureae GN=ATY38_10475 PE=4 SV=1	0.0254573
Nitrosomonas_ureae	A0A0S3AHC3	Uncharacterized protein OS=Nitrosomonas ureae GN=ATY38_03785 PE=4 SV=1	0.0279799
Nitrosomonas_ureae	A0A0S3AM75	MerR family transcriptional regulator OS=Nitrosomonas ureae GN=ATY38_14320 PE=4 SV=1	0.0282978
Nitrosomonas_ureae	A0A0S3AIA9	Uncharacterized protein OS=Nitrosomonas ureae GN=ATY38_06230 PE=4 SV=1	0.0288264
Nitrosomonas_ureae	A0A0S3AL06	Uncharacterized protein OS=Nitrosomonas ureae GN=ATY38_11110 PE=4 SV=1	0.0288375
Nitrosomonas_ureae	A0A0S3AME1	Uncharacterized protein OS=Nitrosomonas ureae GN=ATY38_14725 PE=4 SV=1	0.0292965
Nitrosomonas_ureae	A0A0S3AKW9	Uncharacterized protein OS=Nitrosomonas ureae GN=ATY38_11770 PE=4 SV=1	0.0299254
Nitrosomonas_ureae	A0A0S3AGY8	Serine/threonine protein kinase OS=Nitrosomonas ureae GN=ATY38_03030 PE=4 SV=1	0.0301581
Nitrosomonas_ureae	A0A0S3AH20	Uncharacterized protein OS=Nitrosomonas ureae GN=ATY38_03800 PE=4 SV=1	0.0309946
Nitrosomonas_ureae	A0A0S3AFF3	Uncharacterized protein OS=Nitrosomonas ureae GN=ATY38_00355 PE=4 SV=1	0.031224
Nitrosomonas_ureae	A0A0S3AM29	Transporter OS=Nitrosomonas ureae GN=ATY38_13725 PE=4 SV=1	0.032175
Nitrosomonas_ureae	A0A0S3AHU0	Uncharacterized protein OS=Nitrosomonas ureae GN=ATY38_05650 PE=4 SV=1	0.0323266
Nitrosomonas_ureae	A0A0S3AM77	Sulfotransferase OS=Nitrosomonas ureae GN=ATY38_14145 PE=4 SV=1	0.032602
Nitrosomonas_ureae	A0A0S3AKN4	Uncharacterized protein OS=Nitrosomonas ureae GN=ATY38_11115 PE=4 SV=1	0.0327912
Nitrosomonas_ureae	A0A0S3ALS2	Uncharacterized protein OS=Nitrosomonas ureae GN=ATY38_13625 PE=4 SV=1	0.0330322
Nitrosomonas_ureae	A0A0S3AL18	Flagellar motor protein MotB OS=Nitrosomonas ureae GN=ATY38_11775 PE=3 SV=1	0.0333389
Nitrosomonas_ureae	A0A0S3AHP8	Uncharacterized protein OS=Nitrosomonas ureae GN=ATY38_03830 PE=4 SV=1	0.0346549
Nitrosomonas_ureae	A0A0S3AN06	Uncharacterized protein OS=Nitrosomonas ureae GN=ATY38_06990 PE=4 SV=1	0.0348759
Nitrosomonas_ureae	A0A0S3AMM4	Metal-binding protein SmbP OS=Nitrosomonas ureae GN=ATY38_15135 PE=4 SV=1	0.035582
Nitrosomonas_ureae	A0A0S3AHV7	Uncharacterized protein OS=Nitrosomonas ureae GN=ATY38_05715 PE=4 SV=1	0.0360804
Nitrosomonas_ureae	A0A0S3AGD9	Uncharacterized protein OS=Nitrosomonas ureae GN=ATY38_02865 PE=4 SV=1	0.0361219
Nitrosomonas_ureae	A0A0S3ALR9	Secretion system protein E OS=Nitrosomonas ureae GN=ATY38_13375 PE=4 SV=1	0.0366803
Nitrosomonas_ureae	A0A0S3AFF2	Uncharacterized protein OS=Nitrosomonas ureae GN=ATY38_00845 PE=4 SV=1	0.0367223
Nitrosomonas_ureae	A0A0S3AIG2	Uncharacterized protein OS=Nitrosomonas ureae GN=ATY38_06780 PE=4 SV=1	0.0369619
Nitrosomonas_ureae	A0A0S3AKV9	Uncharacterized protein OS=Nitrosomonas ureae GN=ATY38_11450 PE=4 SV=1	0.0378125
Nitrosomonas_ureae	A0A0S3AM54	Diguanylate cyclase OS=Nitrosomonas ureae GN=ATY38_14050 PE=4 SV=1	0.0380344
Nitrosomonas_ureae	A0A0S3AGY9	Uncharacterized protein OS=Nitrosomonas ureae GN=ATY38_03835 PE=4 SV=1	0.0393048
Nitrosomonas_ureae	A0A0S3ANG9	Uncharacterized protein OS=Nitrosomonas ureae GN=ATY38_03245 PE=4 SV=1	0.0427881
Nitrosomonas_ureae	A0A0S3AM12	Uncharacterized protein OS=Nitrosomonas ureae GN=ATY38_13835 PE=4 SV=1	0.0440382
Nitrosomonas_ureae	A0A0S3AGW0	Endolysin OS=Nitrosomonas ureae GN=ATY38_03780 PE=4 SV=1	0.0470631
Nitrosomonas_ureae	A0A0S3AGB2	Oxidoreductase OS=Nitrosomonas ureae GN=ATY38_02710 PE=4 SV=1	0.0479419
Nitrosomonas_ureae	A0A0S3ALX4	Uncharacterized protein OS=Nitrosomonas ureae GN=ATY38_13620 PE=4 SV=1	0.0482608
Nitrosomonas_ureae	A0A0S3AMH6	Uncharacterized protein OS=Nitrosomonas ureae GN=ATY38_14780 PE=4 SV=1	0.0496909
Nitrosomonas_ureae	A0A0S3AK72	Uncharacterized protein OS=Nitrosomonas ureae GN=ATY38_10345 PE=4 SV=1	0.0512125
Nitrosomonas_ureae	A0A0S3AG85	Uncharacterized protein OS=Nitrosomonas ureae GN=ATY38_02535 PE=4 SV=1	0.0520319
Nitrosomonas_ureae	A0A0S3AII7	NAD(P)H dehydrogenase (quinone) OS=Nitrosomonas ureae GN=ATY38_06935 PE=3 SV=1	0.0532857
Nitrosomonas_ureae	A0A0S3AKC4	Uncharacterized protein OS=Nitrosomonas ureae GN=ATY38_10470 PE=4 SV=1	0.0535474
Nitrosomonas_ureae	A0A0S3AKK5	Uncharacterized protein OS=Nitrosomonas ureae GN=ATY38_11100 PE=4 SV=1	0.0539485
Nitrosomonas_ureae	A0A0S3AM27	Sulfotransferase OS=Nitrosomonas ureae GN=ATY38_14160 PE=4 SV=1	0.0584382
Nitrosomonas_ureae	A0A0S3AIM8	Protogloblin ApPgb OS=Nitrosomonas ureae GN=ATY38_07180 PE=4 SV=1	0.07376
Nitrosomonas_ureae	A0A0S3AM28	Uncharacterized protein OS=Nitrosomonas ureae GN=ATY38_13325 PE=4 SV=1	0.0804083
Nitrosomonas_ureae	A0A0S3AJQ7	Uncharacterized protein OS=Nitrosomonas ureae GN=ATY38_09210 PE=4 SV=1	0.0809756
Nitrosomonas_ureae	A0A0S3AIV2	Cold-shock protein OS=Nitrosomonas ureae GN=ATY38_06885 PE=4 SV=1	0.0844621
Nitrosomonas_ureae	A0A0S3ALQ4	Flagellar motor protein MotB OS=Nitrosomonas ureae GN=ATY38_13370 PE=4 SV=1	0.0854656
Nitrosomonas_ureae	A0A0S3AIH1	Uncharacterized protein OS=Nitrosomonas ureae GN=ATY38_06065 PE=4 SV=1	0.0861469
Nitrosomonas_ureae	A0A0S3ALD3	Uncharacterized protein OS=Nitrosomonas ureae GN=ATY38_11715 PE=4 SV=1	0.09033
Nitrosomonas_ureae	A0A0S3AML8	Uncharacterized protein OS=Nitrosomonas ureae GN=ATY38_13600 PE=4 SV=1	0.0921235
Nitrosomonas_ureae	A0A0S3ALU9	Uncharacterized protein OS=Nitrosomonas ureae GN=ATY38_13605 PE=4 SV=1	0.103065
Nitrosomonas_ureae	A0A0S3AI75	Uncharacterized protein OS=Nitrosomonas ureae GN=ATY38_05520 PE=4 SV=1	0.10747
Nitrosomonas_ureae	A0A0S3AKR2	Peptidoglycan-binding protein OS=Nitrosomonas ureae GN=ATY38_11105 PE=4 SV=1	0.1132
Nitrosomonas_ureae	A0A0S3ALT0	Uncharacterized protein OS=Nitrosomonas ureae GN=ATY38_13365 PE=4 SV=1	0.13055
Nitrosomonas_ureae	A0A0S3AMG5	Uncharacterized protein OS=Nitrosomonas ureae GN=ATY38_14865 PE=4 SV=1	0.136698
Nitrosomonas_ureae	A0A0S3AK63	Uncharacterized protein OS=Nitrosomonas ureae GN=ATY38_10175 PE=4 SV=1	0.152402
Nitrosomonas_ureae	A0A0S3AGD3	Conjugal transfer protein TraT OS=Nitrosomonas ureae GN=ATY38_02860 PE=4 SV=1	0.153745
Nitrosomonas_ureae	A0A0S3ALT2	Uncharacterized protein OS=Nitrosomonas ureae GN=ATY38_13635 PE=4 SV=1	0.15572
Nitrosomonas_ureae	A0A0S3AGD2	Peptidylprolyl isomerase OS=Nitrosomonas ureae GN=ATY38_01935 PE=4 SV=1	0.161166
Nitrosomonas_ureae	A0A0S3AMK6	Uncharacterized protein OS=Nitrosomonas ureae GN=ATY38_14075 PE=4 SV=1	0.19035
Nitrosomonas_ureae	A0A0S3AF46	Uncharacterized protein OS=Nitrosomonas ureae GN=ATY38_00185 PE=4 SV=1	0.207416
Nitrosomonas_ureae	A0A0S3AHD2	Uncharacterized protein OS=Nitrosomonas ureae GN=ATY38_04590 PE=4 SV=1	0.223909
Nitrosomonas_ureae	A0A0S3AHE4	Uncharacterized protein OS=Nitrosomonas ureae GN=ATY38_04755 PE=4 SV=1	0.227911
Nitrosomonas_ureae	A0A0S3AIP1	Uncharacterized protein OS=Nitrosomonas ureae GN=ATY38_06495 PE=4 SV=1	0.236846
Nitrosomonas_ureae	A0A0S3AIC4	Cytochrome OS=Nitrosomonas ureae GN=ATY38_06515 PE=3 SV=1	0.264684
Nitrosomonas_ureae	A0A0S3AH47	Uncharacterized protein OS=Nitrosomonas ureae GN=ATY38_03790 PE=4 SV=1	0.278608
Nitrosomonas_ureae	A0A0S3AG68	Peptidoglycan-binding protein OS=Nitrosomonas ureae GN=ATY38_02420 PE=4 SV=1	0.292863
Nitrosomonas_ureae	A0A0S3AHF1	Bacterioferritin OS=Nitrosomonas ureae GN=ATY38_04585 PE=3 SV=1	0.517586
Nitrosomonas_ureae	A0A0S3AKF1	Uncharacterized protein OS=Nitrosomonas ureae GN=ATY38_10635 PE=4 SV=1	0.713927
Nitrosomonas_ureae	A0A0S3AFI8	Uncharacterized protein OS=Nitrosomonas ureae GN=ATY38_01080 PE=4 SV=1	0.78225
Nitrosomonas_ureae	A0A0S3AMA6	Entry exclusion lipoprotein TrbK OS=Nitrosomonas ureae GN=ATY38_14310 PE=4 SV=1	0.88014
Nitrosomonas_ureae	A0A0S3AIB4	Uncharacterized protein OS=Nitrosomonas ureae GN=ATY38_06535 PE=4 SV=1	1.54947
Nitrosomonas_ureae	A0A0S3AFD2	Nitrite reductase OS=Nitrosomonas ureae GN=ATY38_00595 PE=4 SV=1	2.88794
Nitrosospira_multiformis	Q2Y9V1	HSP20 family protein OS=Nitrosospira multiformis (strain ATCC 25196 / NCIMB 11849 / C 71) GN=Nmul_A1167 PE=3 SV=1	0.000996434
Nitrosospira_multiformis	Q2YC64	Phosphatidylethanolamine N-methyltransferase OS=Nitrosospira multiformis (strain ATCC 25196 / NCIMB 11849 / C 71) GN=Nmul_A0349 PE=4 SV=1	0.0021824
Nitrosospira_multiformis	Q2Y8I3	Nitrogen regulatory protein P-II (GlnB, GlnK) OS=Nitrosospira multiformis (strain ATCC 25196 / NCIMB 11849 / C 71) GN=Nmul_A1638 PE=3 SV=1	0.00255632
Nitrosospira_multiformis	Q2Y9V5	Dienelactone hydrolase family protein OS=Nitrosospira multiformis (strain ATCC 25196 / NCIMB 11849 / C 71) GN=Nmul_A1163 PE=4 SV=1	0.00326066
Nitrosospira_multiformis	Q2Y8A6	Membrane anchored protein OS=Nitrosospira multiformis (strain ATCC 25196 / NCIMB 11849 / C 71) GN=Nmul_A1717 PE=4 SV=1	0.0032854
Nitrosospira_multiformis	Q2Y8S3	Uncharacterized protein OS=Nitrosospira multiformis (strain ATCC 25196 / NCIMB 11849 / C 71) GN=Nmul_A1545 PE=4 SV=1	0.0038353
Nitrosospira_multiformis	Q2YAK1	Putative toxin-antitoxin system antitoxin component, TIGR02293 family OS=Nitrosospira multiformis (strain ATCC 25196 / NCIMB 11849 / C 71) GN=Nmul_A0917 PE=4 SV=1	0.00383714
Nitrosospira_multiformis	Q2Y994	Tetratricopeptide repeat-containing protein OS=Nitrosospira multiformis (strain ATCC 25196 / NCIMB 11849 / C 71) GN=Nmul_A1374 PE=4 SV=1	0.00432533
Nitrosospira_multiformis	Q2YAL2	Isochorismatase hydrolase OS=Nitrosospira multiformis (strain ATCC 25196 / NCIMB 11849 / C 71) GN=Nmul_A0906 PE=4 SV=1	0.00449803
Nitrosospira_multiformis	Q2Y8U6	Uncharacterized protein OS=Nitrosospira multiformis (strain ATCC 25196 / NCIMB 11849 / C 71) GN=Nmul_A1522 PE=4 SV=1	0.00454807
Nitrosospira_multiformis	Q2Y840	Phospholipid-binding protein, PBP family OS=Nitrosospira multiformis (strain ATCC 25196 / NCIMB 11849 / C 71) GN=Nmul_A1784 PE=4 SV=1	0.00464291
Nitrosospira_multiformis	Q2Y8I6	Uncharacterized protein OS=Nitrosospira multiformis (strain ATCC 25196 / NCIMB 11849 / C 71) GN=Nmul_A1635 PE=4 SV=1	0.00468086
Nitrosospira_multiformis	Q2YCC3	Glycosyl transferase, group 1 OS=Nitrosospira multiformis (strain ATCC 25196 / NCIMB 11849 / C 71) GN=Nmul_A0290 PE=4 SV=1	0.00472385
Nitrosospira_multiformis	Q2Y7D4	RES domain-containing protein OS=Nitrosospira multiformis (strain ATCC 25196 / NCIMB 11849 / C 71) GN=Nmul_A2043 PE=4 SV=1	0.0049601
Nitrosospira_multiformis	Q2Y8M6	N-succinylarginine dihydrolase OS=Nitrosospira multiformis (strain ATCC 25196 / NCIMB 11849 / C 71) GN=astB PE=3 SV=1	0.00516522
Nitrosospira_multiformis	Q2YD24	Amine oxidase OS=Nitrosospira multiformis (strain ATCC 25196 / NCIMB 11849 / C 71) GN=Nmul_A0038 PE=4 SV=1	0.00531398
Nitrosospira_multiformis	Q2YC42	UDP-glucoronosyl and UDP-glucosyltransferases family protein OS=Nitrosospira multiformis (strain ATCC 25196 / NCIMB 11849 / C 71) GN=Nmul_A0371 PE=4 SV=1	0.00533793
Nitrosospira_multiformis	Q2Y966	4-alpha-glucanotransferase OS=Nitrosospira multiformis (strain ATCC 25196 / NCIMB 11849 / C 71) GN=Nmul_A1402 PE=3 SV=1	0.00545548
Nitrosospira_multiformis	Q2YCC0	Uncharacterized protein OS=Nitrosospira multiformis (strain ATCC 25196 / NCIMB 11849 / C 71) GN=Nmul_A0293 PE=4 SV=1	0.00548662
Nitrosospira_multiformis	Q2Y8S0	Putative glutamate--cysteine ligase 2 OS=Nitrosospira multiformis (strain ATCC 25196 / NCIMB 11849 / C 71) GN=Nmul_A1548 PE=3 SV=1	0.00550762
Nitrosospira_multiformis	Q2Y969	Patatin OS=Nitrosospira multiformis (strain ATCC 25196 / NCIMB 11849 / C 71) GN=Nmul_A1399 PE=4 SV=1	0.00560466
Nitrosospira_multiformis	Q2Y701	Type III restriction enzyme OS=Nitrosospira multiformis (strain ATCC 25196 / NCIMB 11849 / C 71) GN=Nmul_A2178 PE=4 SV=1	0.00562016
Nitrosospira_multiformis	Q2YCE2	NAD-dependent epimerase/dehydratase OS=Nitrosospira multiformis (strain ATCC 25196 / NCIMB 11849 / C 71) GN=Nmul_A0271 PE=4 SV=1	0.00575106
Nitrosospira_multiformis	Q2Y950	Uncharacterized protein OS=Nitrosospira multiformis (strain ATCC 25196 / NCIMB 11849 / C 71) GN=Nmul_A1418 PE=4 SV=1	0.0058072
Nitrosospira_multiformis	Q2Y915	Uncharacterized protein OS=Nitrosospira multiformis (strain ATCC 25196 / NCIMB 11849 / C 71) GN=Nmul_A1453 PE=4 SV=1	0.00594929
Nitrosospira_multiformis	Q2Y667	ParB-like nuclease OS=Nitrosospira multiformis (strain ATCC 25196 / NCIMB 11849 / C 71) GN=Nmul_A2465 PE=4 SV=1	0.00600632
Nitrosospira_multiformis	Q2Y8I1	Membrane fusion protein, cobalt-zinc-cadmium efflux system OS=Nitrosospira multiformis (strain ATCC 25196 / NCIMB 11849 / C 71) GN=Nmul_A1640 PE=3 SV=1	0.00604157
Nitrosospira_multiformis	Q2Y6U6	NUDIX hydrolase OS=Nitrosospira multiformis (strain ATCC 25196 / NCIMB 11849 / C 71) GN=Nmul_A2233 PE=4 SV=1	0.00654481
Nitrosospira_multiformis	Q2Y7D3	Uncharacterized protein OS=Nitrosospira multiformis (strain ATCC 25196 / NCIMB 11849 / C 71) GN=Nmul_A2044 PE=4 SV=1	0.00672678
Nitrosospira_multiformis	Q2Y703	General stress protein 26 OS=Nitrosospira multiformis (strain ATCC 25196 / NCIMB 11849 / C 71) GN=Nmul_A2175 PE=4 SV=1	0.00677085
Nitrosospira_multiformis	Q2YCB8	Methyltransferase FkbM OS=Nitrosospira multiformis (strain ATCC 25196 / NCIMB 11849 / C 71) GN=Nmul_A0295 PE=4 SV=1	0.00684732
Nitrosospira_multiformis	Q2Y564	Peptidase S1 and S6, chymotrypsin/Hap OS=Nitrosospira multiformis (strain ATCC 25196 / NCIMB 11849 / C 71) GN=Nmul_D2825 PE=4 SV=1	0.00684787
Nitrosospira_multiformis	Q2Y558	Uncharacterized protein OS=Nitrosospira multiformis (strain ATCC 25196 / NCIMB 11849 / C 71) GN=Nmul_D2822 PE=4 SV=1	0.00733778
Nitrosospira_multiformis	Q2Y6M7	Dipeptidyl aminopeptidase/acylaminoacyl peptidase OS=Nitrosospira multiformis (strain ATCC 25196 / NCIMB 11849 / C 71) GN=Nmul_A2303 PE=4 SV=1	0.00749429
Nitrosospira_multiformis	Q2YAQ2	Citrate synthase OS=Nitrosospira multiformis (strain ATCC 25196 / NCIMB 11849 / C 71) GN=Nmul_A0866 PE=3 SV=1	0.00774798
Nitrosospira_multiformis	Q2YBG2	Uncharacterized membrane protein OS=Nitrosospira multiformis (strain ATCC 25196 / NCIMB 11849 / C 71) GN=Nmul_A0602 PE=4 SV=1	0.00786878
Nitrosospira_multiformis	Q2Y896	Hydrophobe/amphiphile efflux-1 HAE1 OS=Nitrosospira multiformis (strain ATCC 25196 / NCIMB 11849 / C 71) GN=Nmul_A1727 PE=3 SV=1	0.00803174
Nitrosospira_multiformis	Q2YAE4	Glycosyl transferase, family 51 OS=Nitrosospira multiformis (strain ATCC 25196 / NCIMB 11849 / C 71) GN=Nmul_A0974 PE=4 SV=1	0.00816412
Nitrosospira_multiformis	Q2YBZ9	Glycosyl transferase family 2 OS=Nitrosospira multiformis (strain ATCC 25196 / NCIMB 11849 / C 71) GN=Nmul_A0414 PE=4 SV=1	0.00821635
Nitrosospira_multiformis	Q2YC63	Cyclase/dehydrase OS=Nitrosospira multiformis (strain ATCC 25196 / NCIMB 11849 / C 71) GN=Nmul_A0350 PE=4 SV=1	0.00874954
Nitrosospira_multiformis	Q2YC88	Helix-turn-helix protein, CopG OS=Nitrosospira multiformis (strain ATCC 25196 / NCIMB 11849 / C 71) GN=Nmul_A0325 PE=4 SV=1	0.00917386
Nitrosospira_multiformis	Q2Y6X7	Glycosyltransferase Family 4 OS=Nitrosospira multiformis (strain ATCC 25196 / NCIMB 11849 / C 71) GN=Nmul_A2202 PE=4 SV=1	0.00925966
Nitrosospira_multiformis	Q2YCD6	Dolichol-phosphate mannosyltransferase OS=Nitrosospira multiformis (strain ATCC 25196 / NCIMB 11849 / C 71) GN=Nmul_A0277 PE=4 SV=1	0.00928749
Nitrosospira_multiformis	Q2Y998	Putative intracellular protease/amidase OS=Nitrosospira multiformis (strain ATCC 25196 / NCIMB 11849 / C 71) GN=Nmul_A1370 PE=4 SV=1	0.0094825
Nitrosospira_multiformis	Q2YAW3	GntR family transcriptional regulator / MocR family aminotransferase OS=Nitrosospira multiformis (strain ATCC 25196 / NCIMB 11849 / C 71) GN=Nmul_A0801 PE=4 SV=1	0.00950685
Nitrosospira_multiformis	Q2Y6E0	PepSY-associated TM helix OS=Nitrosospira multiformis (strain ATCC 25196 / NCIMB 11849 / C 71) GN=Nmul_A2392 PE=4 SV=1	0.0100569
Nitrosospira_multiformis	Q2YCB5	Sulfotransferase family protein OS=Nitrosospira multiformis (strain ATCC 25196 / NCIMB 11849 / C 71) GN=Nmul_A0298 PE=4 SV=1	0.0106869
Nitrosospira_multiformis	Q2Y789	Glyoxalase/bleomycin resistance protein/dioxygenase OS=Nitrosospira multiformis (strain ATCC 25196 / NCIMB 11849 / C 71) GN=Nmul_A2089 PE=4 SV=1	0.0107346
Nitrosospira_multiformis	Q2YCJ8	ATPase OS=Nitrosospira multiformis (strain ATCC 25196 / NCIMB 11849 / C 71) GN=Nmul_A0215 PE=4 SV=1	0.0109444
Nitrosospira_multiformis	Q2YCD7	Uncharacterized protein OS=Nitrosospira multiformis (strain ATCC 25196 / NCIMB 11849 / C 71) GN=Nmul_A0276 PE=4 SV=1	0.0113243
Nitrosospira_multiformis	Q2YBU5	Transketolase OS=Nitrosospira multiformis (strain ATCC 25196 / NCIMB 11849 / C 71) GN=Nmul_A0468 PE=3 SV=1	0.0116817
Nitrosospira_multiformis	Q2YBG8	Uncharacterized protein OS=Nitrosospira multiformis (strain ATCC 25196 / NCIMB 11849 / C 71) GN=Nmul_A0072 PE=4 SV=1	0.0123389
Nitrosospira_multiformis	Q2Y967	Glycogen operon protein OS=Nitrosospira multiformis (strain ATCC 25196 / NCIMB 11849 / C 71) GN=Nmul_A1401 PE=3 SV=1	0.0123736
Nitrosospira_multiformis	Q2Y708	Carboxypeptidase Taq Metallo peptidase. MEROPS family M32 OS=Nitrosospira multiformis (strain ATCC 25196 / NCIMB 11849 / C 71) GN=Nmul_A2170 PE=4 SV=1	0.0124397
Nitrosospira_multiformis	Q2Y9K2	Uncharacterized protein OS=Nitrosospira multiformis (strain ATCC 25196 / NCIMB 11849 / C 71) GN=Nmul_A1266 PE=4 SV=1	0.0124623
Nitrosospira_multiformis	Q2Y6Y1	PEP-CTERM protein-sorting domain-containing protein OS=Nitrosospira multiformis (strain ATCC 25196 / NCIMB 11849 / C 71) GN=Nmul_A2198 PE=4 SV=1	0.0124767
Nitrosospira_multiformis	Q2Y769	Uncharacterized protein OS=Nitrosospira multiformis (strain ATCC 25196 / NCIMB 11849 / C 71) GN=Nmul_A2109 PE=4 SV=1	0.0125576
Nitrosospira_multiformis	Q2YB83	Phosphatidylserine decarboxylase proenzyme OS=Nitrosospira multiformis (strain ATCC 25196 / NCIMB 11849 / C 71) GN=psd PE=3 SV=1	0.0129442
Nitrosospira_multiformis	Q2Y954	Uncharacterized protein OS=Nitrosospira multiformis (strain ATCC 25196 / NCIMB 11849 / C 71) GN=Nmul_A1414 PE=4 SV=1	0.0130706
Nitrosospira_multiformis	Q2Y842	Glycosyltransferase OS=Nitrosospira multiformis (strain ATCC 25196 / NCIMB 11849 / C 71) GN=Nmul_A1782 PE=4 SV=1	0.0132006
Nitrosospira_multiformis	Q2YCB1	Uncharacterized protein OS=Nitrosospira multiformis (strain ATCC 25196 / NCIMB 11849 / C 71) GN=Nmul_A0302 PE=4 SV=1	0.0134291
Nitrosospira_multiformis	Q2Y7U0	PEP-CTERM protein-sorting domain-containing protein/MYXO-CTERM domain-containing protein OS=Nitrosospira multiformis (strain ATCC 25196 / NCIMB 11849 / C 71) GN=Nmul_A1886 PE=4 SV=1	0.0135479
Nitrosospira_multiformis	Q2Y6I4	Uncharacterized protein OS=Nitrosospira multiformis (strain ATCC 25196 / NCIMB 11849 / C 71) GN=Nmul_A2346 PE=4 SV=1	0.0136564
Nitrosospira_multiformis	Q2YAG1	Farnesyl-diphosphate farnesyltransferase OS=Nitrosospira multiformis (strain ATCC 25196 / NCIMB 11849 / C 71) GN=Nmul_A0957 PE=4 SV=1	0.0137681
Nitrosospira_multiformis	Q2Y8L1	Cholesterol transport system auxiliary component OS=Nitrosospira multiformis (strain ATCC 25196 / NCIMB 11849 / C 71) GN=Nmul_A1609 PE=4 SV=1	0.0138229
Nitrosospira_multiformis	Q2Y592	Peptidase C39, bacteriocin processing OS=Nitrosospira multiformis (strain ATCC 25196 / NCIMB 11849 / C 71) GN=Nmul_B2808 PE=4 SV=1	0.0139771
Nitrosospira_multiformis	Q2Y9P9	Uncharacterized protein OS=Nitrosospira multiformis (strain ATCC 25196 / NCIMB 11849 / C 71) GN=Nmul_A1219 PE=4 SV=1	0.0139941
Nitrosospira_multiformis	Q2Y8K9	ABC transporter related protein OS=Nitrosospira multiformis (strain ATCC 25196 / NCIMB 11849 / C 71) GN=Nmul_A1611 PE=4 SV=1	0.0141499
Nitrosospira_multiformis	Q2Y590	Chromosome partitioning protein OS=Nitrosospira multiformis (strain ATCC 25196 / NCIMB 11849 / C 71) GN=Nmul_B2810 PE=4 SV=1	0.0144439
Nitrosospira_multiformis	Q2Y6X4	Uncharacterized conserved protein, LabA/DUF88 family OS=Nitrosospira multiformis (strain ATCC 25196 / NCIMB 11849 / C 71) GN=Nmul_A2205 PE=4 SV=1	0.014575
Nitrosospira_multiformis	Q2Y7J0	Uncharacterized protein OS=Nitrosospira multiformis (strain ATCC 25196 / NCIMB 11849 / C 71) GN=Nmul_A1986 PE=4 SV=1	0.0147122
Nitrosospira_multiformis	Q2YCI7	LEA14-like dessication related protein OS=Nitrosospira multiformis (strain ATCC 25196 / NCIMB 11849 / C 71) GN=Nmul_A0226 PE=4 SV=1	0.0148415
Nitrosospira_multiformis	Q2YAS6	Cold-shock DNA-binding protein family OS=Nitrosospira multiformis (strain ATCC 25196 / NCIMB 11849 / C 71) GN=Nmul_A0840 PE=4 SV=1	0.0148803
Nitrosospira_multiformis	Q2Y694	Uncharacterized protein OS=Nitrosospira multiformis (strain ATCC 25196 / NCIMB 11849 / C 71) GN=Nmul_A2438 PE=4 SV=1	0.0149654
Nitrosospira_multiformis	Q2YAP4	Short-chain dehydrogenase OS=Nitrosospira multiformis (strain ATCC 25196 / NCIMB 11849 / C 71) GN=Nmul_A0874 PE=3 SV=1	0.0153904
Nitrosospira_multiformis	Q2Y5Y1	EF hand OS=Nitrosospira multiformis (strain ATCC 25196 / NCIMB 11849 / C 71) GN=Nmul_A2551 PE=4 SV=1	0.0154658
Nitrosospira_multiformis	Q2Y5L9	Electron transport protein SCO1/SenC OS=Nitrosospira multiformis (strain ATCC 25196 / NCIMB 11849 / C 71) GN=Nmul_A2665 PE=4 SV=1	0.0155757
Nitrosospira_multiformis	Q2Y7H8	Dissimilatory nitrite reductase (NO-forming), copper type apoprotein OS=Nitrosospira multiformis (strain ATCC 25196 / NCIMB 11849 / C 71) GN=Nmul_A1998 PE=4 SV=1	0.0158288
Nitrosospira_multiformis	Q2Y8Q9	Diguanylate cyclase/phosphodiesterase OS=Nitrosospira multiformis (strain ATCC 25196 / NCIMB 11849 / C 71) GN=Nmul_A1559 PE=4 SV=1	0.0160794
Nitrosospira_multiformis	Q2YAC9	Ubiquinone biosynthesis protein UbiJ OS=Nitrosospira multiformis (strain ATCC 25196 / NCIMB 11849 / C 71) GN=Nmul_A0989 PE=4 SV=1	0.0164659
Nitrosospira_multiformis	Q2YCU8	Astacin (Peptidase family M12A) OS=Nitrosospira multiformis (strain ATCC 25196 / NCIMB 11849 / C 71) GN=Nmul_A0114 PE=4 SV=1	0.0164976
Nitrosospira_multiformis	Q2Y9G4	Uncharacterized protein OS=Nitrosospira multiformis (strain ATCC 25196 / NCIMB 11849 / C 71) GN=Nmul_A1304 PE=4 SV=1	0.0165626
Nitrosospira_multiformis	Q2Y9A1	Uncharacterized protein OS=Nitrosospira multiformis (strain ATCC 25196 / NCIMB 11849 / C 71) GN=Nmul_A1367 PE=4 SV=1	0.0168704
Nitrosospira_multiformis	Q2YCF8	Uncharacterized protein OS=Nitrosospira multiformis (strain ATCC 25196 / NCIMB 11849 / C 71) GN=Nmul_A0255 PE=4 SV=1	0.0177877
Nitrosospira_multiformis	Q2Y8P4	Uncharacterized protein OS=Nitrosospira multiformis (strain ATCC 25196 / NCIMB 11849 / C 71) GN=Nmul_A1576 PE=4 SV=1	0.0182088
Nitrosospira_multiformis	Q2Y8N9	Polyketide cyclase / dehydrase and lipid transport OS=Nitrosospira multiformis (strain ATCC 25196 / NCIMB 11849 / C 71) GN=Nmul_A1581 PE=1 SV=1	0.018884
Nitrosospira_multiformis	Q2YBL0	Histidine kinase OS=Nitrosospira multiformis (strain ATCC 25196 / NCIMB 11849 / C 71) GN=Nmul_A0553 PE=4 SV=1	0.019033
Nitrosospira_multiformis	Q2YCB9	Uncharacterized protein OS=Nitrosospira multiformis (strain ATCC 25196 / NCIMB 11849 / C 71) GN=Nmul_A0294 PE=4 SV=1	0.019407
Nitrosospira_multiformis	Q2Y8V5	PRC-barrel OS=Nitrosospira multiformis (strain ATCC 25196 / NCIMB 11849 / C 71) GN=Nmul_A1513 PE=4 SV=1	0.0194523
Nitrosospira_multiformis	Q2Y8M1	5-methylcytosine-specific restriction enzyme A OS=Nitrosospira multiformis (strain ATCC 25196 / NCIMB 11849 / C 71) GN=Nmul_A1599 PE=4 SV=1	0.0198758
Nitrosospira_multiformis	Q2Y8B5	Uncharacterized protein OS=Nitrosospira multiformis (strain ATCC 25196 / NCIMB 11849 / C 71) GN=Nmul_A1708 PE=4 SV=1	0.021187
Nitrosospira_multiformis	Q2YBB0	Uncharacterized protein OS=Nitrosospira multiformis (strain ATCC 25196 / NCIMB 11849 / C 71) GN=Nmul_A0654 PE=4 SV=1	0.0212797
Nitrosospira_multiformis	Q2YC15	3-oxoacyl-[acyl-carrier-protein] synthase 2 OS=Nitrosospira multiformis (strain ATCC 25196 / NCIMB 11849 / C 71) GN=Nmul_A0398 PE=3 SV=1	0.0213928
Nitrosospira_multiformis	Q2YBU6	Phosphoglucomutase OS=Nitrosospira multiformis (strain ATCC 25196 / NCIMB 11849 / C 71) GN=Nmul_A0467 PE=3 SV=1	0.0214494
Nitrosospira_multiformis	Q2Y8L0	Mammalian cell entry related protein OS=Nitrosospira multiformis (strain ATCC 25196 / NCIMB 11849 / C 71) GN=Nmul_A1610 PE=4 SV=1	0.0218327
Nitrosospira_multiformis	Q2YC78	Response regulator receiver modulated diguanylate cyclase/phosphodiesterase OS=Nitrosospira multiformis (strain ATCC 25196 / NCIMB 11849 / C 71) GN=Nmul_A0335 PE=4 SV=1	0.0221458
Nitrosospira_multiformis	Q2YC73	L-serine ammonia-lyase OS=Nitrosospira multiformis (strain ATCC 25196 / NCIMB 11849 / C 71) GN=Nmul_A0340 PE=4 SV=1	0.0221854
Nitrosospira_multiformis	Q2Y750	Sigma54 specific transcriptional regulator, Fis family OS=Nitrosospira multiformis (strain ATCC 25196 / NCIMB 11849 / C 71) GN=Nmul_A2128 PE=4 SV=1	0.0227231
Nitrosospira_multiformis	Q2Y6M3	Putative transcriptional regulator OS=Nitrosospira multiformis (strain ATCC 25196 / NCIMB 11849 / C 71) GN=Nmul_A2307 PE=4 SV=1	0.0232425
Nitrosospira_multiformis	Q2Y897	RND efflux system, outer membrane lipoprotein, NodT OS=Nitrosospira multiformis (strain ATCC 25196 / NCIMB 11849 / C 71) GN=Nmul_A1726 PE=3 SV=1	0.0232708
Nitrosospira_multiformis	Q2Y5N7	Coenzyme F390 synthetase-like protein OS=Nitrosospira multiformis (strain ATCC 25196 / NCIMB 11849 / C 71) GN=Nmul_A2647 PE=4 SV=1	0.0238417
Nitrosospira_multiformis	Q2Y754	Protein required for attachment to host cells OS=Nitrosospira multiformis (strain ATCC 25196 / NCIMB 11849 / C 71) GN=Nmul_A2124 PE=4 SV=1	0.0238634
Nitrosospira_multiformis	Q2YA78	Arginine decarboxylase OS=Nitrosospira multiformis (strain ATCC 25196 / NCIMB 11849 / C 71) GN=Nmul_A1040 PE=4 SV=1	0.0241047
Nitrosospira_multiformis	Q2Y568	Chromosome partitioning protein OS=Nitrosospira multiformis (strain ATCC 25196 / NCIMB 11849 / C 71) GN=Nmul_D2816 PE=4 SV=1	0.024209
Nitrosospira_multiformis	Q2Y958	Uncharacterized protein OS=Nitrosospira multiformis (strain ATCC 25196 / NCIMB 11849 / C 71) GN=Nmul_A1410 PE=4 SV=1	0.0243078
Nitrosospira_multiformis	Q2YB20	Uncharacterized protein OS=Nitrosospira multiformis (strain ATCC 25196 / NCIMB 11849 / C 71) GN=Nmul_A0744 PE=4 SV=1	0.0245612
Nitrosospira_multiformis	Q2Y895	Membrane fusion protein, multidrug efflux system OS=Nitrosospira multiformis (strain ATCC 25196 / NCIMB 11849 / C 71) GN=Nmul_A1728 PE=3 SV=1	0.024973
Nitrosospira_multiformis	Q2Y702	Uncharacterized protein OS=Nitrosospira multiformis (strain ATCC 25196 / NCIMB 11849 / C 71) GN=Nmul_A2177 PE=4 SV=1	0.0255949
Nitrosospira_multiformis	Q2Y857	Uncharacterized protein OS=Nitrosospira multiformis (strain ATCC 25196 / NCIMB 11849 / C 71) GN=Nmul_A1767 PE=4 SV=1	0.0258332
Nitrosospira_multiformis	Q2Y816	Pirin-like protein OS=Nitrosospira multiformis (strain ATCC 25196 / NCIMB 11849 / C 71) GN=Nmul_A1808 PE=3 SV=1	0.0262036
Nitrosospira_multiformis	Q2YC58	Apoptosis-inducing factor, C-term OS=Nitrosospira multiformis (strain ATCC 25196 / NCIMB 11849 / C 71) GN=Nmul_A0355 PE=4 SV=1	0.0273176
Nitrosospira_multiformis	Q2YCM1	Electron transport protein SCO1/SenC OS=Nitrosospira multiformis (strain ATCC 25196 / NCIMB 11849 / C 71) GN=Nmul_A0192 PE=4 SV=1	0.0276941
Nitrosospira_multiformis	Q2Y721	Tyrosinase co-factor MelC1 OS=Nitrosospira multiformis (strain ATCC 25196 / NCIMB 11849 / C 71) GN=Nmul_A2157 PE=4 SV=1	0.0279499
Nitrosospira_multiformis	Q2Y7S8	General secretion pathway protein G OS=Nitrosospira multiformis (strain ATCC 25196 / NCIMB 11849 / C 71) GN=Nmul_A1898 PE=4 SV=1	0.0286065
Nitrosospira_multiformis	Q2YB56	UPF0753 protein Nmul_A0708 OS=Nitrosospira multiformis (strain ATCC 25196 / NCIMB 11849 / C 71) GN=Nmul_A0708 PE=3 SV=1	0.0293913
Nitrosospira_multiformis	Q2YCD0	Acyl carrier protein OS=Nitrosospira multiformis (strain ATCC 25196 / NCIMB 11849 / C 71) GN=Nmul_A0283 PE=4 SV=1	0.0296068
Nitrosospira_multiformis	Q2Y9A9	Uncharacterized protein OS=Nitrosospira multiformis (strain ATCC 25196 / NCIMB 11849 / C 71) GN=Nmul_A1359 PE=4 SV=1	0.0299419
Nitrosospira_multiformis	Q2Y5W7	Uncharacterized protein OS=Nitrosospira multiformis (strain ATCC 25196 / NCIMB 11849 / C 71) GN=Nmul_A2565 PE=4 SV=1	0.030553
Nitrosospira_multiformis	Q2Y7U4	Tetratricopeptide repeat-containing protein OS=Nitrosospira multiformis (strain ATCC 25196 / NCIMB 11849 / C 71) GN=Nmul_A1882 PE=4 SV=1	0.0317199
Nitrosospira_multiformis	Q2YBQ3	Peptidase S1C, Do OS=Nitrosospira multiformis (strain ATCC 25196 / NCIMB 11849 / C 71) GN=Nmul_A0510 PE=4 SV=1	0.0327485
Nitrosospira_multiformis	Q2Y8K4	Uncharacterized integral membrane protein OS=Nitrosospira multiformis (strain ATCC 25196 / NCIMB 11849 / C 71) GN=Nmul_A1616 PE=4 SV=1	0.0327554
Nitrosospira_multiformis	Q2YCG2	Heparinase II/III-like protein OS=Nitrosospira multiformis (strain ATCC 25196 / NCIMB 11849 / C 71) GN=Nmul_A0251 PE=4 SV=1	0.0335847
Nitrosospira_multiformis	Q2YBM8	Uncharacterized protein OS=Nitrosospira multiformis (strain ATCC 25196 / NCIMB 11849 / C 71) GN=Nmul_A0535 PE=4 SV=1	0.0346603
Nitrosospira_multiformis	Q2YB31	Uncharacterized protein OS=Nitrosospira multiformis (strain ATCC 25196 / NCIMB 11849 / C 71) GN=Nmul_A0733 PE=4 SV=1	0.0360254
Nitrosospira_multiformis	Q2Y6Y5	3-deoxy-D-arabinoheptulosonate-7-phosphate synthase OS=Nitrosospira multiformis (strain ATCC 25196 / NCIMB 11849 / C 71) GN=Nmul_A2194 PE=4 SV=1	0.0364711
Nitrosospira_multiformis	Q2YAM2	Uncharacterized protein OS=Nitrosospira multiformis (strain ATCC 25196 / NCIMB 11849 / C 71) GN=Nmul_A0896 PE=4 SV=1	0.0365549
Nitrosospira_multiformis	Q2YC99	Uncharacterized protein OS=Nitrosospira multiformis (strain ATCC 25196 / NCIMB 11849 / C 71) GN=Nmul_A0314 PE=4 SV=1	0.03878
Nitrosospira_multiformis	Q2YCF7	Oxidoreductase-like protein OS=Nitrosospira multiformis (strain ATCC 25196 / NCIMB 11849 / C 71) GN=Nmul_A0256 PE=4 SV=1	0.0396064
Nitrosospira_multiformis	Q2Y5G0	Type I restriction enzyme R protein N terminus (HSDR_N) OS=Nitrosospira multiformis (strain ATCC 25196 / NCIMB 11849 / C 71) GN=Nmul_A2724 PE=4 SV=1	0.0397942
Nitrosospira_multiformis	Q2Y579	Chromosome partitioning protein OS=Nitrosospira multiformis (strain ATCC 25196 / NCIMB 11849 / C 71) GN=NmulC_2788 PE=4 SV=1	0.0427565
Nitrosospira_multiformis	Q2YCK8	Cytochrome c, class I OS=Nitrosospira multiformis (strain ATCC 25196 / NCIMB 11849 / C 71) GN=Nmul_A0205 PE=4 SV=1	0.0430011
Nitrosospira_multiformis	Q2Y9H7	Cold-shock DNA-binding protein family OS=Nitrosospira multiformis (strain ATCC 25196 / NCIMB 11849 / C 71) GN=Nmul_A1291 PE=4 SV=1	0.043007
Nitrosospira_multiformis	Q2Y6G9	Flp pilus assembly CpaB OS=Nitrosospira multiformis (strain ATCC 25196 / NCIMB 11849 / C 71) GN=Nmul_A2361 PE=4 SV=1	0.0434653
Nitrosospira_multiformis	Q2Y6H1	Uncharacterized protein OS=Nitrosospira multiformis (strain ATCC 25196 / NCIMB 11849 / C 71) GN=Nmul_A2359 PE=4 SV=1	0.0439239
Nitrosospira_multiformis	Q2YCD3	2-polyprenyl-3-methyl-5-hydroxy-6-metoxy-1,4-benzoquinol methylase OS=Nitrosospira multiformis (strain ATCC 25196 / NCIMB 11849 / C 71) GN=Nmul_A0280 PE=4 SV=1	0.0459794
Nitrosospira_multiformis	Q2Y980	Uncharacterized protein OS=Nitrosospira multiformis (strain ATCC 25196 / NCIMB 11849 / C 71) GN=Nmul_A1388 PE=4 SV=1	0.0464734
Nitrosospira_multiformis	Q2Y8A7	CHRD domain-containing protein OS=Nitrosospira multiformis (strain ATCC 25196 / NCIMB 11849 / C 71) GN=Nmul_A1716 PE=4 SV=1	0.0466186
Nitrosospira_multiformis	Q2Y573	Uncharacterized protein OS=Nitrosospira multiformis (strain ATCC 25196 / NCIMB 11849 / C 71) GN=NmulC_2794 PE=4 SV=1	0.0468913
Nitrosospira_multiformis	Q2YCF6	Uncharacterized protein OS=Nitrosospira multiformis (strain ATCC 25196 / NCIMB 11849 / C 71) GN=Nmul_A0257 PE=4 SV=1	0.0470867
Nitrosospira_multiformis	Q2YC16	Acyl carrier protein OS=Nitrosospira multiformis (strain ATCC 25196 / NCIMB 11849 / C 71) GN=acpP PE=3 SV=1	0.0552829
Nitrosospira_multiformis	Q2Y6H0	Pilus assembly protein CpaC OS=Nitrosospira multiformis (strain ATCC 25196 / NCIMB 11849 / C 71) GN=Nmul_A2360 PE=3 SV=1	0.0556561
Nitrosospira_multiformis	Q2YCQ8	Uncharacterized protein OS=Nitrosospira multiformis (strain ATCC 25196 / NCIMB 11849 / C 71) GN=Nmul_A0154 PE=4 SV=1	0.0560331
Nitrosospira_multiformis	Q2Y5Q3	Uncharacterized protein OS=Nitrosospira multiformis (strain ATCC 25196 / NCIMB 11849 / C 71) GN=Nmul_A2631 PE=4 SV=1	0.058492
Nitrosospira_multiformis	Q2Y7V2	DNA recombination protein RmuC OS=Nitrosospira multiformis (strain ATCC 25196 / NCIMB 11849 / C 71) GN=Nmul_A1874 PE=4 SV=1	0.0599647
Nitrosospira_multiformis	Q2Y557	Uncharacterized protein OS=Nitrosospira multiformis (strain ATCC 25196 / NCIMB 11849 / C 71) GN=Nmul_D2823 PE=4 SV=1	0.0606625
Nitrosospira_multiformis	Q2Y8Q7	Fructose-bisphosphate aldolase OS=Nitrosospira multiformis (strain ATCC 25196 / NCIMB 11849 / C 71) GN=Nmul_A1561 PE=3 SV=1	0.062933
Nitrosospira_multiformis	Q2YBZ7	3-deoxy-D-manno-oct-2-ulosonic acid (Kdo) hydroxylase OS=Nitrosospira multiformis (strain ATCC 25196 / NCIMB 11849 / C 71) GN=Nmul_A0416 PE=4 SV=1	0.0642006
Nitrosospira_multiformis	Q2Y8P1	Uncharacterized protein OS=Nitrosospira multiformis (strain ATCC 25196 / NCIMB 11849 / C 71) GN=Nmul_A1579 PE=4 SV=1	0.0670804
Nitrosospira_multiformis	Q2Y6P0	Sel1-like repeat OS=Nitrosospira multiformis (strain ATCC 25196 / NCIMB 11849 / C 71) GN=Nmul_A2289 PE=4 SV=1	0.0692662
Nitrosospira_multiformis	Q2YAL3	Putative sigma 54 modulation protein/ribosomal protein S30EA OS=Nitrosospira multiformis (strain ATCC 25196 / NCIMB 11849 / C 71) GN=Nmul_A0905 PE=4 SV=1	0.0695979
Nitrosospira_multiformis	Q2Y7J1	Uncharacterized protein OS=Nitrosospira multiformis (strain ATCC 25196 / NCIMB 11849 / C 71) GN=Nmul_A1985 PE=4 SV=1	0.074731
Nitrosospira_multiformis	Q2Y710	Uncharacterized protein OS=Nitrosospira multiformis (strain ATCC 25196 / NCIMB 11849 / C 71) GN=Nmul_A2168 PE=4 SV=1	0.0762382
Nitrosospira_multiformis	Q2Y7Y1	Uncharacterized protein OS=Nitrosospira multiformis (strain ATCC 25196 / NCIMB 11849 / C 71) GN=Nmul_A1845 PE=4 SV=1	0.0833425
Nitrosospira_multiformis	Q2YC41	2-oxoacid dehydrogenases acyltransferase (Catalytic domain) OS=Nitrosospira multiformis (strain ATCC 25196 / NCIMB 11849 / C 71) GN=Nmul_A0372 PE=4 SV=1	0.0952301
Nitrosospira_multiformis	Q2Y7U9	Uncharacterized protein OS=Nitrosospira multiformis (strain ATCC 25196 / NCIMB 11849 / C 71) GN=Nmul_A1877 PE=4 SV=1	0.095672
Nitrosospira_multiformis	Q2YAM8	Uncharacterized protein OS=Nitrosospira multiformis (strain ATCC 25196 / NCIMB 11849 / C 71) GN=Nmul_A0890 PE=4 SV=1	0.0969743
Nitrosospira_multiformis	Q2Y8Z4	PEP-CTERM protein-sorting domain-containing protein OS=Nitrosospira multiformis (strain ATCC 25196 / NCIMB 11849 / C 71) GN=Nmul_A1474 PE=4 SV=1	0.103733
Nitrosospira_multiformis	Q2Y8Y8	Putative membrane protein OS=Nitrosospira multiformis (strain ATCC 25196 / NCIMB 11849 / C 71) GN=Nmul_A1480 PE=4 SV=1	0.112433
Nitrosospira_multiformis	Q2Y656	Uncharacterized protein OS=Nitrosospira multiformis (strain ATCC 25196 / NCIMB 11849 / C 71) GN=Nmul_A2476 PE=4 SV=1	0.118346
Nitrosospira_multiformis	Q2Y9L8	Uncharacterized protein OS=Nitrosospira multiformis (strain ATCC 25196 / NCIMB 11849 / C 71) GN=Nmul_A1250 PE=4 SV=1	0.119207
Nitrosospira_multiformis	Q2Y8C5	PAP2 superfamily protein OS=Nitrosospira multiformis (strain ATCC 25196 / NCIMB 11849 / C 71) GN=Nmul_A1698 PE=4 SV=1	0.122676
Nitrosospira_multiformis	Q2YCR9	AAA domain-containing protein, putative AbiEii toxin, Type IV TA system OS=Nitrosospira multiformis (strain ATCC 25196 / NCIMB 11849 / C 71) GN=Nmul_A0143 PE=4 SV=1	0.126016
Nitrosospira_multiformis	Q2YBE2	Uncharacterized protein OS=Nitrosospira multiformis (strain ATCC 25196 / NCIMB 11849 / C 71) GN=Nmul_A0622 PE=4 SV=1	0.1272
Nitrosospira_multiformis	Q2Y6T0	Uncharacterized protein OS=Nitrosospira multiformis (strain ATCC 25196 / NCIMB 11849 / C 71) GN=Nmul_A2249 PE=4 SV=1	0.130211
Nitrosospira_multiformis	Q2YCF9	Methyltransferase FkbM OS=Nitrosospira multiformis (strain ATCC 25196 / NCIMB 11849 / C 71) GN=Nmul_A0254 PE=4 SV=1	0.132565
Nitrosospira_multiformis	Q2Y853	Competence protein ComEA OS=Nitrosospira multiformis (strain ATCC 25196 / NCIMB 11849 / C 71) GN=Nmul_A1771 PE=4 SV=1	0.139886
Nitrosospira_multiformis	Q2Y9T3	Membrane-anchored ribosome-binding protein, inhibits growth in stationary phase, ElaB/YqjD/DUF883 family OS=Nitrosospira multiformis (strain ATCC 25196 / NCIMB 11849 / C 71) GN=Nmul_A1185 PE=4 SV=1	0.142996
Nitrosospira_multiformis	Q2Y5N6	Uncharacterized protein OS=Nitrosospira multiformis (strain ATCC 25196 / NCIMB 11849 / C 71) GN=Nmul_A2648 PE=4 SV=1	0.155062
Nitrosospira_multiformis	Q2Y6B3	GTP cyclohydrolase 1 OS=Nitrosospira multiformis (strain ATCC 25196 / NCIMB 11849 / C 71) GN=folE PE=3 SV=1	0.176309
Nitrosospira_multiformis	Q2YBD7	Uncharacterized protein OS=Nitrosospira multiformis (strain ATCC 25196 / NCIMB 11849 / C 71) GN=Nmul_A0627 PE=4 SV=1	0.193191
Nitrosospira_multiformis	Q2Y9K0	Elongation factor P OS=Nitrosospira multiformis (strain ATCC 25196 / NCIMB 11849 / C 71) GN=efp PE=3 SV=1	0.195146
Nitrosospira_multiformis	Q2Y8T5	Uncharacterized protein OS=Nitrosospira multiformis (strain ATCC 25196 / NCIMB 11849 / C 71) GN=Nmul_A1533 PE=4 SV=1	0.203518
Nitrosospira_multiformis	Q2Y648	Hemoglobin OS=Nitrosospira multiformis (strain ATCC 25196 / NCIMB 11849 / C 71) GN=Nmul_A2484 PE=4 SV=1	0.264084
Nitrosospira_multiformis	Q2Y6D9	Uncharacterized protein OS=Nitrosospira multiformis (strain ATCC 25196 / NCIMB 11849 / C 71) GN=Nmul_A2393 PE=4 SV=1	0.271817
Nitrosospira_multiformis	Q2Y6R7	TIR domain-containing protein OS=Nitrosospira multiformis (strain ATCC 25196 / NCIMB 11849 / C 71) GN=Nmul_A2262 PE=4 SV=1	0.290515
Nitrosospira_multiformis	Q2YD35	Uncharacterized protein OS=Nitrosospira multiformis (strain ATCC 25196 / NCIMB 11849 / C 71) GN=Nmul_A0027 PE=4 SV=1	0.311088
Nitrosospira_multiformis	Q2Y844	Uncharacterized protein OS=Nitrosospira multiformis (strain ATCC 25196 / NCIMB 11849 / C 71) GN=Nmul_A1780 PE=4 SV=1	0.365144
Nitrosospira_multiformis	Q2Y9X8	Uncharacterized protein OS=Nitrosospira multiformis (strain ATCC 25196 / NCIMB 11849 / C 71) GN=Nmul_A1140 PE=4 SV=1	0.687904
Nitrosospira_multiformis	Q2Y9X6	Uncharacterized protein OS=Nitrosospira multiformis (strain ATCC 25196 / NCIMB 11849 / C 71) GN=Nmul_A1142 PE=4 SV=1	0.807647
Nitrosospira_multiformis	Q2YBA8	Membrane-anchored ribosome-binding protein, inhibits growth in stationary phase, ElaB/YqjD/DUF883 family OS=Nitrosospira multiformis (strain ATCC 25196 / NCIMB 11849 / C 71) GN=Nmul_A0656 PE=4 SV=1	0.839309
